# Supplementary material for: Application of miRNA Biomarkers in Predicting Overall Survival Outcomes for Lung Adenocarcinoma
Source: Biomed Res Int. 2022 Sep 12;2022:5249576. doi: 10.1155/2022/5249576 (PMC9485713; doi:10.1155/2022/5249576)
Supplement: Supplementary 1 — Table S1: differentially expressed mRNAs. [file 5249576.f1.txt]

mRNA	logFC	FDR
SLC6A4	-6.122892121	5.88E-173
AGER	-5.001283261	2.48E-154
CD300LG	-4.927452115	8.87E-114
FABP4	-4.868739617	4.98E-154
SERTM1	-4.741730995	2.03E-68
SFTPC	-4.698165669	7.05E-69
CSF3	-4.621223245	4.97E-92
ITLN2	-4.607569881	6.84E-71
FAM107A	-4.510081802	1.72E-208
HTR3C	-4.507994741	9.42E-71
FCN3	-4.488713633	5.76E-175
MYOC	-4.483052203	4.00E-94
CLEC4M	-4.439647599	8.30E-102
GPM6A	-4.404990826	9.53E-119
CHRM1	-4.392299287	1.77E-89
ANKRD1	-4.386699172	4.55E-94
HBA1	-4.35626613	2.30E-115
TMEM100	-4.314609238	7.83E-141
CA4	-4.313862268	3.79E-103
FREM3	-4.236494495	4.86E-97
HBB	-4.231895946	9.39E-121
LGI3	-4.227857809	7.89E-70
SH3GL3	-4.197987317	1.69E-81
ANGPT4	-4.195883515	4.27E-157
OR6K3	-4.154243082	7.06E-77
HBA2	-4.127984635	1.03E-119
UPK3B	-4.115789962	5.69E-90
WNT3A	-4.07571019	9.29E-104
ALAS2	-4.053898072	3.17E-106
RTKN2	-4.039428453	6.06E-213
CD5L	-4.021174934	7.76E-101
MCEMP1	-4.004517506	1.49E-111
AC008763.3	-3.9529347	1.64E-79
C10orf67	-3.939630877	8.84E-98
GPD1	-3.911765281	8.00E-126
OVCH1	-3.89218346	2.41E-95
KCNA4	-3.859073319	1.18E-60
TNR	-3.814544873	7.83E-91
CYP1A2	-3.80063817	2.58E-41
SGCG	-3.7992223	4.00E-134
SSTR4	-3.782826567	1.84E-78
RS1	-3.702042034	1.34E-92
GRIA1	-3.679859526	9.89E-72
SOSTDC1	-3.679668575	5.88E-56
GPIHBP1	-3.679511749	1.05E-110
CLEC3B	-3.664686751	1.94E-135
CLIC5	-3.600515781	7.48E-116
OTC	-3.59213772	2.52E-61
PI16	-3.555747545	2.80E-71
PTPRQ	-3.548122	1.58E-55
VEGFD	-3.546567696	8.91E-76
CHRNA2	-3.543810098	7.46E-54
TNNC1	-3.536038149	4.62E-116
SCUBE1	-3.532573918	3.07E-112
CLDN18	-3.513741231	8.92E-39
NCKAP5	-3.488488038	3.48E-98
ANGPTL7	-3.488258056	2.12E-53
ADAMTS8	-3.487555465	3.47E-94
INMT	-3.472789801	3.26E-115
DEFA3	-3.470591405	5.98E-33
EDNRB	-3.464318224	2.40E-177
DNASE1L3	-3.458234212	1.59E-90
ARMH2	-3.427007591	5.77E-46
ARC	-3.417414072	1.88E-91
ADRA1A	-3.405663821	9.78E-52
CAV1	-3.404520542	7.64E-135
CNTN6	-3.404492458	1.38E-61
FHL1	-3.387122634	2.69E-146
BTNL9	-3.383393565	6.33E-101
SLC4A1	-3.382603002	2.10E-89
CHRM2	-3.373529506	6.25E-36
PTPN5	-3.372764947	4.07E-76
STXBP6	-3.359219137	4.87E-104
HAS1	-3.345096628	9.95E-58
PRX	-3.341292174	1.39E-170
MYZAP	-3.300184506	9.93E-153
ADCY8	-3.297767031	6.07E-26
CACNA1S	-3.296163619	1.26E-43
ST8SIA6	-3.292683231	2.97E-94
CAVIN2	-3.273449116	1.74E-146
FOSB	-3.26392338	7.64E-52
FOLR3	-3.263718803	7.11E-44
GYPE	-3.249709202	1.65E-124
FMO2	-3.247765658	9.12E-143
ADH1B	-3.240227524	5.71E-58
DPP6	-3.224744292	1.81E-86
TEK	-3.222683092	2.74E-194
SCGB1A1	-3.207935206	9.31E-26
RAMP3	-3.1948987	2.42E-191
VIPR1	-3.192393937	2.56E-124
SEMA3G	-3.191119973	4.47E-195
SPOCK2	-3.174263369	2.33E-154
LYVE1	-3.16782851	7.57E-127
NECAB1	-3.156981208	5.13E-108
GDF10	-3.154612108	2.18E-68
MYH2	-3.109577448	2.06E-57
ACADL	-3.108228591	4.43E-65
ODAM	-3.106727171	1.44E-38
KRT79	-3.101416793	1.55E-47
ADRB1	-3.101150394	6.14E-67
CTXND1	-3.085528407	2.01E-52
TCF21	-3.080019725	1.24E-93
HELT	-3.078227104	5.82E-25
INMT-MINDY4	-3.070372538	4.64E-53
RXFP1	-3.065719473	1.30E-112
GP9	-3.056863183	2.41E-52
FGFBP2	-3.049816156	2.43E-53
ADRB2	-3.047721808	1.89E-128
RSPO1	-3.04170748	3.79E-55
SEC14L3	-3.034977671	4.62E-29
DES	-3.022091383	7.90E-67
MARCO	-3.005333339	7.34E-66
CAV3	-2.999099205	1.51E-41
WFIKKN2	-2.998858637	8.83E-49
MGAT3	-2.997345893	4.89E-77
STX11	-2.9797399	2.00E-195
PCDH15	-2.978703198	1.36E-38
CCDC141	-2.978674094	9.02E-62
ALKAL2	-2.963400892	8.68E-67
PCARE	-2.944208237	1.60E-35
FPR2	-2.942432121	1.86E-69
AGRP	-2.9382046	7.05E-72
AQP4	-2.935083992	1.11E-44
RETN	-2.928117478	1.04E-44
OVCH2	-2.919955241	6.56E-41
FXYD1	-2.917681711	5.47E-108
SOX7	-2.909370764	5.97E-121
FGF10	-2.909117739	3.91E-44
SELE	-2.900135329	1.46E-61
FAM189A2	-2.892043171	3.11E-92
AGBL1	-2.889707583	2.85E-28
LRRC36	-2.881610283	1.85E-53
DNASE2B	-2.881509258	1.88E-53
CMTM5	-2.877645028	1.80E-73
SLC19A3	-2.868980171	2.00E-72
CD36	-2.868741086	2.50E-73
C2orf91	-2.856439678	1.82E-50
RAMP2	-2.856007675	7.24E-172
RGCC	-2.846705147	3.92E-193
CXCR1	-2.845300993	4.06E-58
HHIP	-2.835532987	3.22E-34
FO681492.1	-2.835245558	7.26E-62
ADGRE3	-2.832974986	4.98E-77
SIRPB1	-2.832328323	4.30E-93
IL1RL1	-2.832091866	2.84E-38
S1PR1	-2.822632392	3.47E-196
SLC14A1	-2.822373716	7.50E-68
IL6	-2.816340157	4.23E-56
RBP2	-2.81622412	2.29E-35
ROBO4	-2.813611839	9.08E-162
KANK3	-2.811701265	6.38E-147
ABCA8	-2.801849302	1.53E-68
SFTPA1	-2.797119217	1.90E-31
IGSF10	-2.790915001	1.52E-61
COL6A6	-2.78890891	8.94E-60
LIMS2	-2.781686752	1.09E-160
SCN4B	-2.780204589	1.36E-93
CCDC85A	-2.779957144	4.66E-83
TENT5B	-2.779640107	9.45E-98
ANOS1	-2.77427503	5.83E-101
CD101	-2.767860942	5.24E-149
HSPA12B	-2.763215732	8.48E-171
HIGD1B	-2.762156319	4.03E-105
TAL1	-2.760979485	8.75E-141
ACTN2	-2.75890183	4.48E-64
LAMP3	-2.7467657	5.42E-78
CALCRL	-2.734012458	4.04E-149
FHL5	-2.728607708	8.15E-89
MT1M	-2.727457105	9.77E-49
RXFP2	-2.719295575	2.32E-22
LRRN3	-2.719030681	4.86E-60
FOXF1	-2.717779262	5.61E-143
CASQ2	-2.716118643	5.76E-55
GPA33	-2.714337829	3.15E-34
EMP2	-2.712003793	1.22E-180
EMCN	-2.710675239	7.10E-115
PPP1R17	-2.71027263	3.10E-26
F11	-2.707798254	2.42E-26
PLAC9	-2.688602519	2.39E-136
ADGRE1	-2.687279465	8.43E-64
SPAAR	-2.685201284	6.14E-188
EPAS1	-2.682984896	3.23E-205
CLDN5	-2.68003619	3.93E-82
SOX17	-2.679330482	3.24E-106
MASP1	-2.67640643	3.05E-69
PLA2G4F	-2.675915139	1.68E-57
EDN3	-2.672513187	2.76E-18
TNXB	-2.669147104	2.43E-59
CPB2	-2.669010316	4.34E-22
CDO1	-2.661870231	2.69E-78
MAMDC2	-2.658342454	7.32E-61
SLCO1A2	-2.654889955	2.63E-19
NMUR1	-2.646596667	2.22E-97
SFTPA2	-2.643028205	4.40E-28
GCOM1	-2.634735916	2.11E-64
ARHGEF26	-2.634254264	1.59E-123
AOC3	-2.628198387	1.35E-112
SYNPO2L	-2.626339775	4.10E-63
MFAP4	-2.624886233	1.26E-75
CAMP	-2.618144281	3.45E-39
SLC6A13	-2.617680043	8.44E-47
SFRP5	-2.612241078	7.28E-26
C14orf132	-2.610612248	3.67E-106
PRKG2	-2.61005726	4.54E-72
C8B	-2.609824568	2.39E-21
VEPH1	-2.606856563	7.68E-54
TUBB1	-2.6028488	3.82E-72
DCC	-2.594846326	1.16E-57
TRHDE	-2.592381371	1.73E-26
C20orf202	-2.589546996	1.11E-117
ASPA	-2.587333667	9.16E-74
NPR1	-2.584417791	4.09E-84
RSPO2	-2.579419417	1.40E-31
IQSEC3	-2.575454496	1.87E-71
LDB2	-2.574772964	1.36E-167
CXCR2	-2.568712463	3.22E-66
JPH4	-2.565449987	5.65E-98
PTPRB	-2.560506545	5.93E-114
CRTAC1	-2.555849739	2.12E-36
AWAT2	-2.552897497	4.41E-25
HBEGF	-2.552624259	2.61E-97
EFCC1	-2.551758694	5.13E-99
ACVRL1	-2.543251386	1.34E-188
TMCO2	-2.538982439	1.70E-44
DEFA4	-2.538071205	1.35E-16
PEBP4	-2.537075556	3.41E-26
DUOX1	-2.533893953	3.49E-51
CATSPERD	-2.529172302	7.22E-22
TGFBR3	-2.528473789	1.82E-85
MOGAT1	-2.527156568	7.29E-32
SMAD6	-2.525421081	5.57E-131
CDH5	-2.524348453	3.89E-154
SEMA6A	-2.521284739	1.23E-91
OLR1	-2.520103826	1.94E-70
UNC45B	-2.512812352	5.61E-70
SEMA5A	-2.505560015	3.99E-76
C2orf40	-2.503163871	1.08E-28
SLC5A9	-2.500640163	1.56E-41
GLDN	-2.497079306	1.46E-65
AKAP2	-2.496754971	3.54E-82
CCL23	-2.49549657	8.25E-56
GSTA3	-2.492552257	1.23E-21
PADI4	-2.491757445	6.00E-46
HSPB3	-2.491683221	1.10E-40
CYP4B1	-2.491652201	2.21E-28
TCEAL2	-2.487675068	7.85E-31
JAM2	-2.486556201	2.88E-151
SYT15	-2.484763193	5.56E-56
CCM2L	-2.484414846	3.40E-118
LIN7A	-2.477885069	1.74E-60
AL096711.2	-2.476771899	7.26E-53
LIPN	-2.471503336	1.19E-35
GRIK4	-2.468304678	1.44E-67
MME	-2.466636147	2.48E-43
GRK5	-2.465801423	1.81E-131
VWC2	-2.465249259	1.88E-35
C11orf97	-2.465208293	1.17E-16
ABI3BP	-2.464960309	7.71E-73
KCNT2	-2.464876434	3.29E-48
SLC39A8	-2.462054689	2.86E-109
SLIT2	-2.461289671	5.90E-102
RGS9	-2.454920779	5.38E-105
HSPB6	-2.446946347	1.62E-53
DACH1	-2.442646684	5.26E-60
FGFR4	-2.434277318	5.93E-51
CCL24	-2.433707955	1.71E-35
GIMAP8	-2.433579808	2.86E-135
BCHE	-2.43045082	1.96E-44
GSTM5	-2.430231052	1.96E-88
ANXA8L1	-2.429740112	5.47E-26
ARHGEF15	-2.428537699	4.39E-124
ANGPTL5	-2.425134384	7.29E-44
PTPN21	-2.421404987	1.11E-168
LCN6	-2.4210511	8.19E-32
HBG2	-2.419794751	1.00E-37
LRRC2	-2.418632216	5.51E-63
C11orf88	-2.415524847	2.69E-21
SLC27A6	-2.411544208	7.15E-18
PTCRA	-2.411078832	2.56E-59
SIGLEC11	-2.409622459	1.63E-62
PKNOX2	-2.407956425	5.63E-68
CCL14	-2.407084533	9.89E-46
THBD	-2.40680743	1.26E-92
PLPPR5	-2.406285153	6.33E-23
FRMD3	-2.402436625	4.02E-86
CNTFR	-2.401309136	7.71E-26
SLIT3	-2.40128747	3.90E-63
IQCN	-2.400887192	1.12E-55
TGM1	-2.396421646	1.36E-64
NOVA2	-2.395501788	3.71E-116
NXPH3	-2.395046732	1.86E-85
SLITRK2	-2.392318501	4.96E-28
NRG3	-2.387640957	6.74E-30
C1orf87	-2.379945483	6.23E-17
SEL1L2	-2.379841354	1.51E-25
ACKR4	-2.379257134	2.42E-49
GSG1L	-2.376010199	5.07E-26
DAO	-2.375469104	1.18E-38
C1QTNF7	-2.375094707	1.10E-46
OTP	-2.374253246	2.54E-16
C9orf24	-2.373334606	2.02E-22
CXCL2	-2.370101491	2.85E-49
VSIG4	-2.369009559	5.69E-62
EXD1	-2.368217526	1.50E-41
HEMGN	-2.36643508	1.38E-36
HPSE2	-2.362851057	8.35E-34
FFAR4	-2.359216172	2.53E-49
PDK4	-2.357687477	2.55E-51
CACNA2D2	-2.357033182	1.20E-30
ECSCR	-2.35545438	6.09E-140
S100A3	-2.354426116	1.99E-60
ACKR1	-2.35326187	1.09E-42
CSRNP1	-2.352077584	2.24E-117
LRRC32	-2.349449606	1.10E-128
AFF3	-2.347727588	1.30E-40
G6PC2	-2.346861713	4.37E-18
CD52	-2.338710271	1.22E-72
ZBED2	-2.338669595	2.11E-52
SCN7A	-2.336021696	6.97E-47
ARHGAP6	-2.334716789	7.42E-105
PCOLCE2	-2.3337947	3.28E-37
FAM216B	-2.329357568	1.89E-18
FCGR3B	-2.328631073	2.10E-38
SYNDIG1L	-2.327414108	1.38E-29
MMRN1	-2.326084859	7.26E-56
CAV2	-2.325953986	5.78E-74
ODF3L1	-2.32488092	9.54E-61
KIAA0408	-2.324688943	1.47E-29
CFD	-2.323374099	4.31E-56
WWC2	-2.318479157	5.19E-159
RXRG	-2.31639949	2.12E-25
GRASP	-2.315521484	1.76E-111
AGTR2	-2.312358681	6.12E-14
ADAMTS1	-2.3101169	1.26E-77
BDNF	-2.307507163	3.14E-31
ANKRD66	-2.302950433	2.85E-17
FAM110D	-2.298147609	8.94E-91
GGTLC3	-2.298006063	1.38E-25
MRC1	-2.297683088	1.74E-49
VWF	-2.295818388	3.22E-82
SELP	-2.294834284	3.71E-75
SCARA5	-2.293114879	4.80E-23
PECAM1	-2.291009722	6.29E-192
USHBP1	-2.290117765	2.86E-112
ANGPTL1	-2.287249818	2.96E-45
MSR1	-2.286524646	5.17E-66
CLEC1A	-2.283898403	6.16E-126
RSPO4	-2.283854249	1.02E-31
SYN2	-2.281457547	1.57E-29
RASIP1	-2.279807543	2.54E-104
DKK2	-2.278892188	7.14E-71
MROH9	-2.278424259	1.72E-18
TBC1D26	-2.277034663	2.82E-19
ADAMTSL3	-2.273482149	5.33E-59
CLEC14A	-2.272739335	1.03E-122
ADGRG4	-2.271523486	6.79E-14
SPN	-2.269154413	1.91E-85
SH2D3C	-2.269049257	8.37E-142
KL	-2.268533676	3.57E-39
CMTM2	-2.265688536	4.00E-83
FAM162B	-2.265348841	3.36E-72
CHRDL1	-2.264704226	7.72E-37
SULT1C4	-2.264693138	4.95E-62
UMOD	-2.262175612	1.39E-05
GPR146	-2.255357848	4.26E-106
PHACTR1	-2.254723811	1.25E-78
COX4I2	-2.254221771	9.89E-75
KCNA5	-2.253008114	2.36E-50
SPATS1	-2.252450368	8.23E-12
ATP1A2	-2.251745417	3.99E-39
KLF4	-2.251568694	2.09E-60
HBD	-2.25141214	2.54E-25
KCNA10	-2.249258881	2.43E-20
CYYR1	-2.247854137	7.07E-139
WIF1	-2.245019125	1.46E-14
ANGPT1	-2.242890502	4.01E-57
ERICH4	-2.241321512	2.11E-40
SBSPON	-2.235252125	1.01E-39
ANKRD34C	-2.235075181	3.07E-15
HSD17B6	-2.233527239	8.80E-33
FGD5	-2.232612376	1.25E-135
GPX3	-2.231065364	1.03E-58
C1orf158	-2.230064606	5.38E-14
MYCT1	-2.22973082	3.87E-122
NR4A3	-2.224708878	9.75E-36
C20orf85	-2.222478676	6.00E-13
TEKT1	-2.222185406	1.59E-15
NIM1K	-2.218217026	2.53E-38
THSD1	-2.214709013	3.14E-112
SH3GL2	-2.214682688	9.36E-16
SFTPD	-2.211446263	2.13E-24
DLC1	-2.211408492	8.30E-61
OR2W3	-2.207721858	4.74E-16
AL645922.1	-2.206340838	5.35E-30
PIP5K1B	-2.205548993	2.61E-49
RADIL	-2.204235877	5.15E-45
OSCAR	-2.202932474	2.19E-65
PRSS35	-2.201779879	6.34E-38
SSTR1	-2.201704436	3.98E-26
SH2D4B	-2.198629766	1.40E-53
AL049634.2	-2.196636887	1.13E-27
ST6GALNAC5	-2.19637642	6.56E-58
KLK3	-2.195205413	1.04E-06
PDZD2	-2.193595385	1.87E-52
PIH1D3	-2.193473699	8.37E-15
PKHD1L1	-2.192275972	2.62E-21
LTBP4	-2.192197728	1.14E-87
GLIPR2	-2.191008144	1.19E-97
CGNL1	-2.18926585	6.56E-85
SNTN	-2.187340777	5.55E-19
DCSTAMP	-2.186739917	2.88E-37
ART4	-2.185406938	4.51E-34
STARD8	-2.183559007	1.21E-124
CD93	-2.183151048	3.03E-106
BMPER	-2.181805309	1.30E-27
GPER1	-2.18139327	2.86E-46
CDH19	-2.179952796	8.66E-20
TCTE1	-2.17554686	4.75E-18
TPPP3	-2.174931591	4.57E-33
CYP2F1	-2.171243755	3.01E-14
LRRC18	-2.170914953	3.00E-21
MORN5	-2.170111989	1.31E-15
DPEP2	-2.170056798	3.36E-77
KCNK3	-2.169250882	2.76E-29
C1orf194	-2.168901555	4.70E-19
SLC1A1	-2.166092302	5.78E-49
CCDC178	-2.163183414	2.08E-26
CORO2B	-2.163098715	1.92E-61
AQP10	-2.162530512	1.38E-23
MPIG6B	-2.159313605	5.55E-62
TBX4	-2.158695739	1.92E-55
TUBA4B	-2.158413528	2.31E-18
TMEM212	-2.156357148	4.83E-13
WISP2	-2.15614232	7.67E-55
SLC22A8	-2.15399646	7.42E-11
LOXHD1	-2.153592867	8.87E-46
CFAP77	-2.146028676	7.81E-17
PLA2G1B	-2.140536251	1.02E-17
TNS1	-2.14010071	1.62E-100
FEZ1	-2.137005792	1.94E-101
OGN	-2.135486353	1.33E-23
GPC3	-2.130810968	1.96E-33
ANKRD29	-2.129719492	1.73E-36
FAM189A1	-2.128551593	9.10E-28
PRAM1	-2.126699362	5.82E-63
SIRPD	-2.121371922	2.78E-45
ERG	-2.11947805	6.82E-118
TMEM132C	-2.117407757	6.44E-16
SERPINA9	-2.116929412	1.15E-16
FIBIN	-2.113006613	1.63E-49
CELA2B	-2.110384341	2.48E-46
TMEM88	-2.110215918	5.62E-71
MS4A7	-2.109986577	3.89E-72
RAI2	-2.107467985	1.13E-82
MMRN2	-2.106887193	6.97E-116
ADCYAP1R1	-2.106128992	4.97E-44
HEG1	-2.10456293	4.10E-96
ARHGAP31	-2.103967981	1.02E-92
TBX3	-2.09786857	1.38E-70
ALOX15	-2.096902178	5.82E-15
ZBTB16	-2.096379322	5.29E-21
TRIM58	-2.096309122	1.32E-17
CA3	-2.093042354	1.02E-32
OTUD1	-2.08912406	6.54E-206
FGR	-2.088971957	2.91E-76
NTM	-2.08854167	3.94E-42
TRPM1	-2.088194	1.29E-17
KCNIP1	-2.088101652	2.05E-42
ADTRP	-2.085256296	4.54E-40
LDLR	-2.085078252	1.49E-82
CEACAM8	-2.082227579	1.93E-12
ABCA3	-2.08129066	1.69E-35
KRT4	-2.074926568	2.97E-13
ANO2	-2.074921431	5.26E-48
JCAD	-2.07456905	3.36E-86
IL5RA	-2.074219546	2.62E-25
CD300C	-2.073538416	1.65E-61
GIMAP6	-2.072838623	7.46E-97
TMEM190	-2.071532555	4.17E-14
ITGA8	-2.070400672	4.10E-56
MFAP3L	-2.063691869	3.68E-46
SEC14L6	-2.063642769	3.86E-31
ITIH5	-2.063531597	8.58E-38
CFP	-2.059742771	1.15E-61
KIAA1324L	-2.059163398	3.62E-66
STAC	-2.058498355	9.35E-36
CCBE1	-2.057153571	4.89E-24
RASGRF1	-2.056833224	4.78E-23
SVEP1	-2.056558133	7.08E-46
CAVIN1	-2.055994751	2.95E-97
NLRC4	-2.05060381	4.64E-87
TTC29	-2.05021667	3.73E-14
COLEC10	-2.049937627	5.84E-19
LPL	-2.049743997	3.05E-27
IL33	-2.048519209	3.99E-39
CFAP52	-2.047971934	5.50E-20
EFCAB1	-2.047475411	3.97E-16
CCDC54	-2.045610235	1.30E-31
MAG	-2.044500131	6.09E-16
CAPSL	-2.044444975	1.27E-13
RGR	-2.041979302	1.54E-12
KCNE1B	-2.041940359	1.61E-16
FAM180B	-2.041438748	4.16E-22
LRRC71	-2.038239545	2.58E-15
PNMA8C	-2.037519999	1.00E-19
CFAP161	-2.037238553	2.84E-22
CCDC173	-2.037129978	8.31E-31
STOML3	-2.034513683	7.53E-13
AKAP14	-2.033586225	2.42E-13
PACRG	-2.031534289	1.80E-21
PTX3	-2.026941165	1.16E-27
LHFPL3	-2.025179969	1.28E-15
CYP3A7	-2.024734385	9.98E-37
WDR38	-2.024148137	3.17E-14
LILRA5	-2.020762623	1.42E-48
ERICH3	-2.020406115	3.26E-12
PROK2	-2.020027289	1.30E-23
IL7R	-2.019879361	1.52E-52
ABCG2	-2.017006431	6.93E-65
SEMA6D	-2.016659184	1.18E-33
TRAPPC3L	-2.016313185	4.04E-40
PALMD	-2.014765013	1.53E-68
ACSM2A	-2.011422886	1.47E-14
PPBP	-2.011285347	1.77E-13
ITM2A	-2.011121245	8.02E-70
RNF182	-2.008972965	2.64E-24
NDRG4	-2.008032373	1.56E-43
SUSD2	-1.996975858	7.92E-21
GPR17	-1.995576829	8.17E-28
GHR	-1.992817455	1.24E-43
TSPAN18	-1.991141833	5.74E-72
EDN1	-1.990513918	3.01E-45
MMP19	-1.989316283	8.25E-52
C6	-1.988677489	4.94E-15
C18orf63	-1.988173901	3.22E-12
ADGB	-1.986602255	1.83E-12
SGCA	-1.986484103	4.01E-41
FGF2	-1.985799088	9.22E-42
GIMAP1	-1.984918499	2.25E-87
PEAR1	-1.984577262	1.32E-74
PF4	-1.980503268	2.21E-17
STARD13	-1.978402366	1.06E-116
RBP4	-1.978130281	2.92E-19
KIF17	-1.977149527	5.67E-71
ADGRA1	-1.976381781	7.28E-11
LRRK2	-1.97620329	9.46E-24
C1orf141	-1.975426072	1.33E-08
DNAH9	-1.973611785	7.73E-12
APOLD1	-1.973254339	1.49E-63
SPATA4	-1.969490472	5.90E-18
PGLYRP1	-1.964757148	7.43E-21
DNAI2	-1.963274509	6.50E-13
MYADM	-1.962565187	2.57E-85
DYNLRB2	-1.958818283	1.24E-18
CPED1	-1.957549311	2.16E-54
SLC24A4	-1.956881217	5.75E-39
HSPB8	-1.953939428	3.69E-55
FAM92B	-1.953536168	3.40E-16
CYP1A1	-1.95265063	5.34E-06
DUOXA1	-1.950853789	2.23E-28
TIE1	-1.949971144	7.41E-84
S100A12	-1.949728552	3.17E-18
CCIN	-1.947845377	2.09E-35
PCYT1B	-1.946641249	4.72E-24
C6orf118	-1.945765241	2.52E-11
EPPIN-WFDC6	-1.943022106	4.71E-10
C5AR1	-1.942299142	2.94E-64
TINCR	-1.940020574	1.14E-19
SPARCL1	-1.93781142	1.36E-73
CNGA4	-1.935969112	6.59E-17
SOCS2	-1.934619097	3.66E-40
CCDC81	-1.933062444	1.53E-29
ZNF366	-1.932827062	1.32E-56
GPM6B	-1.932738645	4.50E-52
ST6GALNAC3	-1.930803403	8.31E-52
DYDC2	-1.930741815	1.37E-18
AVPR2	-1.925845235	2.17E-30
ALOX5AP	-1.925840983	1.80E-47
CRYAB	-1.923791197	1.65E-45
CFAP65	-1.922116447	1.82E-15
PDLIM2	-1.92196157	1.58E-106
FPR1	-1.919978952	5.93E-44
PPP1R14A	-1.917213245	1.84E-52
ERVFRD-1	-1.916330432	6.85E-21
PID1	-1.913918472	6.66E-46
ZMYND10	-1.91355837	6.01E-20
RASGRP4	-1.913162348	2.67E-65
ESAM	-1.909617446	6.64E-61
GUCY1A2	-1.907058238	6.35E-41
COX7A1	-1.906208389	8.38E-78
DRC1	-1.903763988	5.77E-15
SLC46A2	-1.903209994	6.32E-18
DHH	-1.900844666	2.04E-40
WNT7A	-1.900396272	1.04E-11
DAPK2	-1.897754533	5.68E-55
XIRP2	-1.897582157	2.47E-11
WASF3	-1.89659225	1.64E-53
LMO2	-1.896488976	7.77E-105
NXF3	-1.895118227	3.75E-15
KLF17	-1.895054965	1.65E-32
ADH1A	-1.894377571	6.85E-15
CST5	-1.893336644	8.11E-16
RGS22	-1.893016526	6.07E-21
FAM183A	-1.892148237	2.49E-17
FXYD6	-1.891666907	3.76E-74
AHNAK	-1.890552747	2.91E-54
PRLH	-1.889334496	1.09E-10
PPP1R42	-1.889044819	1.68E-14
P3H2	-1.887276851	3.82E-25
TMEM204	-1.8857826	2.95E-94
MS4A15	-1.885366674	2.01E-10
FAM167A	-1.885063743	1.23E-27
CASS4	-1.884088825	4.42E-60
AMER2	-1.883623805	7.38E-10
FAT3	-1.882424586	9.79E-18
TBX2	-1.881162707	5.80E-62
TIMP3	-1.879722505	5.49E-39
PTH1R	-1.87963822	2.24E-44
CAT	-1.876141128	1.24E-104
TRPV2	-1.875404592	3.09E-80
WFDC6	-1.875277539	1.64E-08
LEFTY2	-1.874559942	7.38E-20
AARD	-1.874021912	1.01E-16
ADGRL2	-1.872461474	1.27E-56
SCN2B	-1.870968613	4.73E-27
ADRA1D	-1.868978541	1.10E-22
RD3	-1.867765926	2.05E-20
TMEM139	-1.864681537	4.27E-22
HYAL1	-1.864081224	1.56E-26
SCN1A	-1.86379722	1.24E-17
MS4A2	-1.861869915	5.24E-27
METTL7A	-1.860549863	1.40E-64
DOK2	-1.858130775	2.79E-54
RPH3A	-1.857989577	1.25E-20
C1orf189	-1.857630147	1.62E-14
CNKSR2	-1.856340645	7.11E-29
PCDH9	-1.85517	1.74E-19
MDGA1	-1.854847538	4.17E-47
NTRK3	-1.853861804	2.09E-29
ANXA3	-1.853047789	2.92E-44
EGR2	-1.852236889	6.67E-50
KRT27	-1.850808955	2.10E-16
F2RL3	-1.849781003	9.05E-43
A2M	-1.849643789	6.56E-56
ACOXL	-1.848346668	2.71E-27
NTNG1	-1.846608037	1.17E-14
NTRK2	-1.846438287	7.64E-15
SNX22	-1.845275126	6.25E-66
C1QTNF2	-1.845024083	1.89E-48
PGM5	-1.844325289	5.01E-35
GPBAR1	-1.842950452	1.27E-47
RHOJ	-1.842910691	4.95E-94
EGR1	-1.842154719	5.28E-36
PPP1R15A	-1.840707532	1.01E-91
ITLN1	-1.836079402	1.21E-05
GATA2	-1.835994675	1.12E-54
CHRNA4	-1.83544461	3.36E-11
C11orf91	-1.835358609	3.76E-23
MSRB3	-1.834412464	4.25E-63
CFAP58	-1.831890639	4.53E-21
KLHL33	-1.829822986	2.45E-28
ZNF365	-1.829771329	7.52E-34
WFDC1	-1.829288829	1.24E-39
PRKCE	-1.828251919	2.55E-115
HSPB2	-1.827157963	4.20E-56
APOBEC4	-1.826137283	3.80E-10
TPSB2	-1.824797097	4.86E-24
CLEC12A	-1.824398908	1.54E-30
LRRC46	-1.824233955	6.39E-21
FAM124B	-1.823462141	1.24E-56
SASH1	-1.823347813	8.41E-101
ID4	-1.822530584	1.97E-32
CTSG	-1.822172539	1.02E-18
ZDHHC19	-1.818068283	3.99E-23
ALOX5	-1.817591466	8.80E-53
ADAMTSL4	-1.817041173	6.98E-41
SLC5A4	-1.815887877	1.45E-30
LEPR	-1.815770173	9.40E-35
TMEM150B	-1.812665816	1.87E-40
SYNM	-1.811407196	1.09E-75
MYH11	-1.811258161	4.72E-30
MYOZ1	-1.810623979	7.88E-24
LMOD1	-1.809122844	3.66E-50
LKAAEAR1	-1.806267982	1.41E-15
LMNTD1	-1.80465134	2.07E-09
VWA3B	-1.804341082	1.87E-15
TACC1	-1.801479027	4.06E-78
FABP5	-1.80090379	1.25E-34
SHC3	-1.799512887	4.47E-32
ROPN1L	-1.798943276	3.12E-15
SLC11A1	-1.798647568	9.79E-45
SYNC	-1.79846778	2.67E-59
ACP5	-1.798435276	2.63E-57
SRL	-1.796544803	6.12E-36
LGALSL	-1.794749028	1.55E-61
RAPGEF4	-1.79422527	3.95E-58
C1orf162	-1.793830261	3.17E-63
RANBP3L	-1.79220118	5.22E-28
GIMAP7	-1.792156507	3.37E-63
NOTCH4	-1.792116272	1.05E-80
SYNPO2	-1.791118049	3.69E-43
ZFP36	-1.789127719	1.18E-38
CDH13	-1.788423181	5.65E-43
ZNF423	-1.786710154	3.06E-51
AGTR1	-1.785334097	6.83E-20
FAM181A	-1.783727894	3.15E-10
RCAN1	-1.780786463	1.57E-81
DEPP1	-1.780204495	6.62E-46
FAM166B	-1.780118449	4.76E-17
ROR1	-1.779643647	1.00E-41
PREX2	-1.779416175	1.35E-33
GKN2	-1.779404015	1.04E-07
F8	-1.779020147	7.65E-81
OR1L8	-1.778670921	1.15E-25
AJAP1	-1.778323656	4.06E-19
TLR8	-1.778009189	5.94E-34
CABCOCO1	-1.775646858	6.17E-17
DYDC1	-1.774598994	1.28E-10
TEKT3	-1.774413326	2.31E-22
NPR3	-1.772322956	2.80E-37
MAS1L	-1.771032127	1.10E-11
C11orf96	-1.770986821	1.03E-37
NPNT	-1.770251425	3.87E-30
KCNJ5	-1.769773117	7.22E-26
S1PR4	-1.769017358	3.52E-53
CLIC3	-1.768444736	5.55E-24
SH2D1B	-1.766882339	2.17E-27
HK3	-1.766337415	8.53E-35
HMGCLL1	-1.765400196	7.15E-27
NDNF	-1.764136779	2.87E-24
KLF6	-1.763414468	3.73E-84
C7	-1.762866187	6.63E-20
SLCO2A1	-1.762347749	5.92E-37
KRT1	-1.761318659	3.33E-13
FBLN5	-1.759454801	4.62E-40
PDE2A	-1.75872026	1.03E-52
AHSP	-1.755925221	3.14E-12
GFOD1	-1.754947478	1.51E-56
CWH43	-1.75471516	1.86E-07
JAML	-1.754176522	2.87E-47
CD300LF	-1.752993207	1.56E-39
FLRT3	-1.752721476	5.50E-29
RSPH1	-1.752418568	2.22E-18
EMP1	-1.752220151	1.28E-50
LRRTM4	-1.748578369	2.16E-13
MS4A3	-1.748317532	6.24E-12
CFAP73	-1.74778911	2.56E-14
CXorf36	-1.747751349	1.01E-66
PCDHGB7	-1.743634529	1.95E-49
RSPH4A	-1.743530752	5.81E-15
GYPC	-1.742876346	2.18E-73
FGFR2	-1.742176636	4.76E-31
CFAP61	-1.741014007	2.21E-16
BCL6B	-1.740781845	3.71E-76
CMA1	-1.740701753	3.08E-16
ATF3	-1.739359606	1.66E-29
NOS1	-1.738788496	4.11E-09
CYBRD1	-1.738539903	2.56E-44
ADCY4	-1.738424321	2.84E-68
GADD45B	-1.734501759	2.03E-50
TMEM232	-1.73407528	7.32E-17
SLC22A10	-1.733520203	4.53E-11
ADARB1	-1.733027256	1.58E-86
CLEC1B	-1.732448701	2.11E-20
NR4A1	-1.732031182	5.14E-23
BMP2	-1.7316287	8.40E-28
TEKT4	-1.73154341	1.24E-12
EGR3	-1.731196852	1.39E-29
DENND2A	-1.730558407	9.44E-50
AMOTL1	-1.729595824	2.37E-63
PLCXD2	-1.729512898	2.34E-31
FABP12	-1.729452115	4.98E-07
TMOD1	-1.728500319	1.71E-37
IL13	-1.728002007	3.06E-17
TSLP	-1.727062352	1.01E-22
GATA6	-1.726187916	2.80E-34
P2RY1	-1.725825775	4.01E-55
PLCL1	-1.725440479	6.27E-62
TPSAB1	-1.72478138	4.97E-26
PPP4R4	-1.72468245	5.97E-19
MT1A	-1.718865557	2.79E-11
GAS6	-1.718697862	2.21E-53
TSPAN7	-1.718644703	1.20E-19
HRCT1	-1.717614538	6.10E-29
TMEM47	-1.717274952	8.44E-55
GIPC2	-1.716886945	1.57E-22
MS4A8	-1.716528672	9.32E-09
LMCD1	-1.714393645	4.29E-87
KLF2	-1.714170529	1.15E-39
FCN1	-1.712394423	2.20E-26
CHI3L2	-1.711500651	1.16E-19
SPTBN1	-1.711282187	3.66E-97
DNAI1	-1.709322165	3.63E-11
NHSL1	-1.708433346	2.83E-52
ACE	-1.708096812	1.24E-55
DENND3	-1.707289369	3.73E-84
SYNPO	-1.707136586	4.48E-68
GATA1	-1.706404287	5.04E-32
CYP27A1	-1.705238717	2.66E-40
RAB40A	-1.704823046	1.67E-42
FAM13C	-1.703402765	3.20E-43
IL3RA	-1.703371659	2.16E-84
MYL3	-1.701495363	3.38E-34
WFS1	-1.700490503	2.17E-79
STARD9	-1.698863166	9.01E-42
CXCL3	-1.697903257	2.02E-22
PTGDS	-1.694888974	2.02E-27
NKAPL	-1.693356196	1.59E-26
PGR	-1.693320988	1.44E-28
MYL9	-1.693267089	2.73E-57
FRMPD4	-1.693178374	1.22E-09
RSPH10B2	-1.692806208	7.68E-14
IL20RA	-1.692428689	2.97E-24
SHROOM4	-1.691587469	1.28E-40
SMTNL2	-1.690057582	5.90E-24
P2RX2	-1.68973577	7.08E-13
MYOCD	-1.689670032	1.15E-17
SYNE3	-1.688526673	1.83E-48
ERBB4	-1.687334653	3.80E-15
GFRA2	-1.687284523	2.48E-30
HMOX1	-1.687188241	2.79E-40
CFAP299	-1.685875242	1.54E-10
AATK	-1.684427212	8.53E-22
PCDH12	-1.684040232	4.79E-69
GNG11	-1.683976994	2.80E-30
SAXO2	-1.683862493	1.62E-15
LHFPL6	-1.683621745	1.62E-83
MGAT4D	-1.681895482	3.40E-08
ANKRD33B	-1.681065894	4.86E-27
KHDRBS2	-1.680054205	9.84E-15
AFAP1L1	-1.677621471	4.29E-70
C2orf73	-1.677428105	1.21E-12
PCDH17	-1.675667279	3.25E-53
COLEC12	-1.673931371	7.85E-32
CD83	-1.673363217	3.47E-56
TCTEX1D4	-1.673276638	6.65E-18
CLEC6A	-1.672996114	7.05E-16
C22orf15	-1.672459744	7.58E-13
GJA5	-1.672395125	2.98E-46
EML1	-1.671811949	4.13E-52
MYO7B	-1.670888824	7.52E-17
ZNF385B	-1.665793924	6.56E-13
CPA3	-1.664370278	1.31E-21
CXorf57	-1.663775711	2.19E-28
NCF2	-1.663157688	1.44E-48
KIR3DL1	-1.662711055	4.13E-10
CYP7A1	-1.661229988	1.64E-21
NRN1	-1.659954193	5.35E-26
RNF144B	-1.659902902	1.99E-62
DTHD1	-1.657854142	3.88E-13
SOX5	-1.657596849	6.31E-31
FLI1	-1.65577255	1.11E-70
TPPP	-1.655707281	1.13E-24
ART1	-1.654566678	7.56E-12
TTLL10	-1.652788162	5.11E-13
SLC6A5	-1.652775762	0.001107307
CASKIN2	-1.65123763	3.11E-92
EFHB	-1.650642962	3.76E-17
LAMC3	-1.650609694	1.14E-30
FOS	-1.648026865	2.74E-26
PHOSPHO1	-1.647085998	4.77E-33
CD34	-1.645648032	2.31E-63
ABCA9	-1.645507771	8.66E-31
KLF9	-1.642120096	7.21E-61
WDR63	-1.64152491	1.82E-15
NEGR1	-1.641454414	6.98E-25
CLEC4E	-1.639842449	3.42E-23
LGI4	-1.63914192	2.82E-52
TCEAL6	-1.63873215	5.74E-12
TGFBR2	-1.636960651	4.30E-73
KCNAB1	-1.636692514	2.86E-43
TMSB15A	-1.635679014	5.04E-14
MEFV	-1.633404619	9.48E-31
SELENOP	-1.633180698	1.05E-35
RGS9BP	-1.631649075	1.98E-22
ITPRIP	-1.631558734	2.77E-63
TCTEX1D1	-1.63085871	3.30E-19
FBP1	-1.629036723	1.07E-41
GPRIN2	-1.628230696	7.17E-24
CNTNAP3B	-1.627853334	1.34E-15
CBX7	-1.62646534	3.40E-65
DCDC2B	-1.625543095	5.30E-14
NTN4	-1.625515672	9.35E-45
REM1	-1.625081676	3.27E-44
SOX18	-1.622562533	9.80E-43
SLC25A25	-1.622190971	2.53E-69
LILRA1	-1.62072087	2.50E-42
VIT	-1.620050632	5.80E-10
REEP1	-1.619432233	6.49E-18
APLN	-1.618426443	3.49E-23
OLFML1	-1.618184048	3.42E-50
CCDC60	-1.617626199	1.15E-09
SESN1	-1.614087967	2.29E-77
KANK2	-1.613076764	2.58E-105
PEAK1	-1.61155597	1.25E-78
ELMOD1	-1.610748613	2.51E-17
NEBL	-1.609449945	1.94E-41
ARHGAP44	-1.607926596	2.51E-36
CYR61	-1.607822137	6.16E-35
CDHR4	-1.60552514	1.06E-08
GIMAP5	-1.604035493	2.49E-30
CFAP206	-1.603272668	4.57E-15
MYRF	-1.603224144	1.46E-16
GRM3	-1.602971281	1.39E-16
UBASH3B	-1.60143681	1.92E-38
RFX2	-1.601320453	5.95E-46
C10orf53	-1.598649827	7.16E-07
DNAH10	-1.597577474	2.06E-15
APOBR	-1.596795205	1.42E-37
ACSS3	-1.59665996	2.38E-25
ZBBX	-1.596243622	1.83E-08
CCDC170	-1.594607402	1.61E-18
RIMS4	-1.593713444	8.31E-09
CD68	-1.592351172	4.08E-35
RTN1	-1.591436295	1.05E-31
PRR9	-1.591303031	0.001069489
KCTD16	-1.590619731	2.45E-21
ENG	-1.587860888	2.61E-58
SLC26A3	-1.586733673	1.43E-09
PDE5A	-1.586611142	9.52E-46
MUSK	-1.586234824	1.20E-14
TEKT2	-1.585467107	3.03E-12
CTGF	-1.58545455	3.34E-35
ECT2L	-1.5852272	1.44E-11
GALNT13	-1.582976466	3.49E-11
HOXA5	-1.5824502	4.04E-40
C1QB	-1.582167259	5.84E-30
MS4A14	-1.581105455	2.76E-28
ENKUR	-1.579653362	1.66E-13
ARMC4	-1.57922228	1.58E-11
CCDC33	-1.578322731	1.14E-08
ADPRH	-1.577758533	1.59E-89
GCSAML	-1.577500485	2.76E-16
VSIR	-1.577415756	2.34E-77
RASL12	-1.576842311	6.16E-52
LTC4S	-1.57656615	6.76E-20
LIMCH1	-1.575588237	3.27E-44
COL6A5	-1.575058013	2.14E-17
SLC15A2	-1.572539182	5.55E-28
C13orf42	-1.572010044	2.36E-07
MAP3K19	-1.571052706	8.10E-10
NDST1	-1.570881895	6.84E-97
FZD4	-1.570667919	8.05E-43
LIFR	-1.570415115	7.17E-33
L1TD1	-1.570033637	9.35E-16
SPI1	-1.569983893	2.09E-39
SPAG6	-1.569884905	5.87E-09
MFSD2A	-1.569072235	7.33E-27
PTGER4	-1.568837754	7.04E-42
MAP3K15	-1.568667996	1.10E-13
EFEMP1	-1.568475674	1.66E-33
KCNE1	-1.567723691	4.02E-19
ABCB1	-1.567500637	9.61E-28
LRP2BP	-1.566713195	1.87E-27
CEACAM21	-1.565634753	6.49E-30
CPAMD8	-1.564487772	2.54E-17
PDE1B	-1.564355905	7.18E-35
NHLRC4	-1.563714173	5.27E-22
C1orf115	-1.563650902	3.58E-33
PPARG	-1.56144821	1.24E-24
NES	-1.56107436	3.20E-34
GPR182	-1.560845702	1.08E-30
GPR4	-1.560292932	4.70E-48
SCD5	-1.560199525	1.30E-26
INKA2	-1.560001464	7.99E-63
TOGARAM2	-1.558563626	1.05E-15
CFAP53	-1.558472213	1.86E-19
C1QA	-1.558012815	2.83E-31
PRKCQ	-1.556801829	4.77E-33
TMEM273	-1.55595524	5.18E-47
TLL1	-1.554969802	4.71E-28
GATA5	-1.554120658	9.27E-20
KCNMB2	-1.55309065	4.83E-14
SORBS1	-1.551759148	9.50E-45
NRG1	-1.551613986	6.72E-17
TLR4	-1.550805983	2.76E-36
KLRF1	-1.550784232	1.29E-20
FILIP1	-1.549092891	3.31E-23
ADGRB3	-1.549062725	4.31E-14
DUSP1	-1.548993379	2.00E-27
LDB3	-1.548725177	1.21E-26
CX3CR1	-1.548451658	4.43E-19
PRELP	-1.54792957	8.17E-28
PAK5	-1.546718762	4.36E-08
GABRA4	-1.546176897	5.62E-05
SCIMP	-1.545758549	1.66E-35
RECK	-1.544573109	8.12E-62
IL17D	-1.544060765	5.72E-35
SPHKAP	-1.541072662	3.69E-05
AQP9	-1.540383085	1.51E-20
NEDD9	-1.539904523	2.80E-32
ACSBG1	-1.539680761	2.94E-18
CFAP43	-1.536705168	1.83E-12
PNPLA6	-1.536685812	2.35E-92
ENDOU	-1.536648299	4.66E-22
ATP1B2	-1.536385166	7.96E-28
CHST9	-1.536291823	2.27E-06
AC004691.2	-1.535027364	1.05E-18
TRIM71	-1.534929959	4.97E-08
DPYSL2	-1.53392407	7.69E-53
TOX2	-1.533573114	5.88E-32
SRPX	-1.532161738	3.65E-19
PCDHGC3	-1.531474818	1.22E-38
ROBO2	-1.529788267	2.18E-15
OSTN	-1.528394799	4.06E-07
CACNG6	-1.525457106	6.47E-07
CACNB4	-1.523211565	2.59E-17
CCRL2	-1.522288169	3.38E-35
EFCAB12	-1.518905084	2.27E-15
SIGLEC5	-1.517640216	8.23E-26
SEC14L4	-1.515510338	5.95E-16
NEXN	-1.515055358	8.99E-43
NEK5	-1.514116798	1.08E-16
CAMK2A	-1.513047168	1.61E-22
DOCK4	-1.512424395	2.64E-53
RSPH10B	-1.510585987	3.57E-14
MFNG	-1.509586124	1.50E-59
VIP	-1.507821406	1.70E-18
SLC8A3	-1.506077623	8.52E-18
STMND1	-1.505531382	3.41E-09
C5orf49	-1.5046762	2.57E-12
ATOH8	-1.50455267	7.00E-14
PRG4	-1.504295852	5.65E-07
DNAH12	-1.504258638	3.36E-09
SEMA3B	-1.503493826	1.39E-17
PILRA	-1.501941909	2.59E-38
ATP6V0D2	-1.501853573	2.97E-15
MYOM2	-1.501554123	9.88E-26
MAOB	-1.497563989	2.39E-24
HYDIN	-1.497106158	8.42E-10
OSBPL6	-1.496623576	1.09E-21
MVB12B	-1.495764454	3.51E-52
LDLRAD1	-1.495128517	1.76E-09
ST6GALNAC2	-1.493772295	8.31E-24
CNR1	-1.49363768	7.59E-16
SEPT4	-1.493606391	1.81E-58
PRIMA1	-1.493583543	1.63E-09
MATN3	-1.493493473	1.21E-19
AQP1	-1.493351067	1.85E-13
SOCS3	-1.493300343	1.80E-33
SLC31A2	-1.492463785	1.06E-41
MAFF	-1.491949146	9.44E-50
S1PR5	-1.488311777	2.63E-17
ENHO	-1.486507977	1.33E-12
PROS1	-1.486092583	6.74E-40
GFRA1	-1.485383105	2.26E-12
CATIP	-1.485163433	3.03E-15
SNCA	-1.485093128	3.76E-30
CCL2	-1.483135498	5.53E-26
ADAMTS15	-1.482406167	2.12E-20
FRAS1	-1.481425291	2.55E-17
CNN1	-1.480429012	3.56E-26
RBMS3	-1.480043965	1.00E-28
MYH10	-1.478936335	9.90E-46
DNAAF1	-1.47835532	8.96E-11
TTLL7	-1.47765246	2.23E-18
CCDC69	-1.476882089	2.77E-42
FRY	-1.474590723	2.14E-43
HOXA4	-1.473798883	7.32E-17
F10	-1.473634412	9.33E-22
TBX5	-1.472274999	1.45E-35
NDRG2	-1.471977128	1.57E-32
PDE8B	-1.471230839	1.59E-40
TYROBP	-1.469698113	6.70E-29
TTPA	-1.469409282	1.74E-09
DUSP26	-1.466942485	4.69E-17
HSD17B13	-1.466893154	2.00E-08
NOSTRIN	-1.466689736	1.06E-27
PLLP	-1.465646341	1.70E-25
CNRIP1	-1.465455525	6.35E-55
PDGFB	-1.465240724	1.01E-41
DPT	-1.465146222	3.87E-20
GMFG	-1.464276577	1.27E-42
GIMAP4	-1.463644139	1.81E-48
DCN	-1.460680338	1.51E-30
PRPH	-1.458894707	7.94E-11
INKA1	-1.455858621	2.59E-37
APLNR	-1.454722652	4.30E-27
DRC7	-1.454029323	2.65E-09
IL18R1	-1.45363703	1.08E-27
ACR	-1.451420455	2.46E-17
RSPH14	-1.450303835	3.47E-11
PAPSS2	-1.449967932	1.00E-36
EPPIN	-1.449639079	1.14E-06
KCNRG	-1.449516399	9.44E-15
DUSP27	-1.449400179	5.43E-06
PCSK9	-1.449382977	3.06E-09
ITIH3	-1.448831487	1.16E-28
STON1-GTF2A1L	-1.448780506	3.20E-16
MNDA	-1.448641369	2.02E-29
TGM4	-1.446185829	6.66E-12
TMEM74B	-1.444557694	5.91E-25
SELPLG	-1.442758565	6.02E-40
GGTLC2	-1.441612986	2.21E-09
PTPRO	-1.441398702	1.18E-27
LMOD3	-1.441080654	7.63E-32
RASGEF1B	-1.440559896	1.61E-52
CYS1	-1.440506988	1.04E-12
RGS13	-1.439569349	4.97E-16
KIF26A	-1.439054686	7.30E-17
SLC16A11	-1.438209562	4.73E-15
PRICKLE1	-1.437733671	1.25E-31
P2RY14	-1.43666131	8.57E-32
MARC2	-1.436513361	1.68E-39
SLC7A7	-1.436016401	4.54E-42
HSPB7	-1.435851092	2.25E-24
ANXA8	-1.433851435	7.00E-07
PHACTR2	-1.433530764	1.04E-45
GAS2L2	-1.433116143	1.14E-08
CDHR3	-1.432515147	7.39E-09
GJA4	-1.431231026	2.87E-38
CD33	-1.431151099	1.24E-30
RAB11FIP1	-1.430508364	4.11E-37
CFAP74	-1.430391017	3.08E-09
TSPAN19	-1.428795318	1.79E-05
JDP2	-1.428065984	2.55E-69
PRRG3	-1.42803165	1.18E-18
TNNI2	-1.427365097	3.65E-14
INSYN1	-1.426004356	9.57E-14
JUND	-1.424335478	2.73E-47
PCDH11X	-1.423225275	2.53E-07
PPP1R32	-1.421717237	1.13E-20
RTL3	-1.42105952	3.39E-14
SLCO2B1	-1.420832715	2.94E-30
APOC4-APOC2	-1.417866682	6.52E-13
NCBP2L	-1.417244578	4.80E-10
NFIX	-1.417119862	2.39E-27
RAB44	-1.416272397	1.75E-18
TTC16	-1.41623661	2.00E-13
METTL21C	-1.4136384	1.06E-07
HACD4	-1.412713367	1.83E-46
MAPK4	-1.411583823	1.98E-06
FAM167B	-1.411214667	1.09E-41
APOC1	-1.409216247	2.79E-19
JPH2	-1.408979764	7.94E-22
TM6SF1	-1.407282347	4.11E-34
KRT72	-1.405595152	2.42E-08
LSAMP	-1.405468767	1.17E-24
SHANK3	-1.404844011	2.80E-50
ARHGEF6	-1.403804306	1.65E-46
SPEF1	-1.403118014	2.36E-11
LHX6	-1.402952424	5.07E-27
SPATA18	-1.402620372	8.26E-13
PLSCR4	-1.402367928	9.00E-48
MAP6	-1.402253781	1.35E-21
FRMPD1	-1.398440519	8.93E-10
SMAD9	-1.397279455	2.15E-18
ZNF705A	-1.396730601	2.40E-11
GRID1	-1.395070667	2.55E-25
ABLIM3	-1.394719851	1.27E-22
MAP1LC3C	-1.394686066	1.04E-12
ALS2CR12	-1.393635587	1.74E-13
GJC2	-1.393584226	3.02E-23
GALNT18	-1.39334615	2.10E-41
PRICKLE2	-1.39316119	1.94E-44
CCL15-CCL14	-1.392705973	8.55E-06
COL4A3	-1.392587056	4.36E-14
GPC5	-1.391946605	1.61E-08
ICAM2	-1.391261628	4.01E-46
ARSF	-1.391233923	3.12E-12
RETREG1	-1.390255301	9.87E-18
PDYN	-1.389711495	3.92E-07
ANKUB1	-1.389065999	5.50E-07
PHLDB2	-1.388310626	6.33E-24
PPARGC1B	-1.386609821	7.23E-31
EPB41L2	-1.386508562	1.56E-45
FERMT2	-1.385994199	7.85E-65
SMCO3	-1.385974183	1.59E-19
SH3BP5	-1.385040125	9.81E-38
LPA	-1.384752504	5.82E-06
LILRA6	-1.384333167	6.52E-24
LY86	-1.383450266	5.61E-26
TNS2	-1.382341605	1.06E-41
SERPING1	-1.381769327	5.33E-40
GRAPL	-1.380155475	6.02E-17
SOBP	-1.379642748	3.02E-21
HMCN2	-1.379344758	2.24E-16
KNCN	-1.379163232	1.92E-05
RSPH9	-1.377548696	1.54E-20
CFL2	-1.377327732	8.22E-47
C10orf105	-1.377147576	2.02E-11
ABCG1	-1.376713331	4.79E-37
BTK	-1.376216328	4.30E-33
LMO7	-1.374079268	7.54E-40
KLF15	-1.373418627	2.26E-14
ZNF474	-1.373154156	2.07E-11
PLPP3	-1.371914703	6.31E-73
MYOZ3	-1.371735722	7.41E-24
MDH1B	-1.369502425	1.43E-12
FAM49A	-1.369490349	4.40E-38
AC008878.3	-1.368890719	3.57E-10
PTPRM	-1.367672408	8.90E-36
MOBP	-1.367324287	1.10E-10
CD300E	-1.366399954	1.69E-16
CTNNAL1	-1.365682598	3.34E-52
TPRG1	-1.36333303	9.14E-21
SIGLEC14	-1.362882878	3.37E-17
LRRIQ1	-1.361010027	6.45E-10
PTPRT	-1.360007973	3.45E-06
CCDC13	-1.359284267	1.17E-17
CAB39L	-1.358488438	3.60E-46
KLF13	-1.357931793	1.16E-61
GBP7	-1.357544556	2.33E-11
LILRB3	-1.355357758	5.26E-34
PAQR5	-1.355273797	4.43E-19
KCNJ15	-1.354330635	3.50E-12
CFAP57	-1.352915653	4.36E-11
LRRC10B	-1.352657263	2.08E-09
SCEL	-1.351449379	7.56E-14
AC007906.2	-1.350133631	9.67E-08
CADM1	-1.34999313	7.56E-19
PLCE1	-1.349811367	5.64E-32
KRT222	-1.34894858	7.53E-15
SLC15A3	-1.34823847	1.97E-34
ARHGAP24	-1.346609565	1.43E-45
MOCS1	-1.34367113	4.23E-39
TTC25	-1.343446551	1.37E-15
VSIG2	-1.343426442	1.66E-09
HPGDS	-1.342543	1.33E-15
HLF	-1.342374903	1.80E-11
APBB1	-1.341669833	1.36E-37
TOM1L2	-1.340495331	1.29E-62
CFAP46	-1.339446821	6.15E-08
UTRN	-1.339032078	6.63E-40
SECISBP2L	-1.338788758	1.89E-31
FBLN1	-1.338258269	1.40E-24
PRKG1	-1.33808174	1.94E-30
FAM124A	-1.337766399	7.26E-33
IRX1	-1.337307951	7.94E-06
NFASC	-1.336724077	1.48E-18
CLDN24	-1.336347059	1.02E-05
LST1	-1.335026766	1.70E-22
RFLNB	-1.334163993	6.12E-44
PTGIR	-1.333799303	6.54E-39
EYA4	-1.331190299	1.11E-08
CYBB	-1.330809852	4.31E-21
BTNL8	-1.330513986	1.31E-06
CD244	-1.328132294	1.49E-22
CCDC152	-1.32737635	8.44E-32
ZEB1	-1.326197833	9.59E-40
TMEM252	-1.325061087	1.81E-08
ENPP6	-1.324266599	6.32E-15
ARAP3	-1.322682906	1.01E-53
AADAC	-1.322622675	3.31E-06
RRAS	-1.322529483	8.67E-38
CD302	-1.321605177	1.02E-26
DRC3	-1.321383334	1.73E-17
FLT4	-1.320578243	1.88E-33
CASP5	-1.319926557	6.19E-17
HLA-E	-1.319356516	1.30E-52
HCK	-1.317685083	2.79E-24
MYLK3	-1.316615776	2.64E-11
RNF122	-1.316284282	8.24E-51
ZEB2	-1.314613214	1.60E-30
HCAR2	-1.312663648	3.58E-11
QKI	-1.312125285	7.25E-61
PDE1C	-1.311033902	5.99E-11
CRIM1	-1.310664284	4.68E-37
GAB1	-1.310571607	4.85E-46
ALPP	-1.31027689	9.97E-06
AK7	-1.310190906	8.83E-15
PAX6	-1.309378008	2.05E-28
ST6GALNAC6	-1.308667887	1.01E-61
BMPR2	-1.308118207	1.39E-72
NCF1	-1.307485201	1.62E-22
GALNT16	-1.306665157	1.40E-12
NFAM1	-1.305656595	3.77E-26
SLC5A7	-1.305640458	0.000189966
KANK4	-1.305317943	7.65E-10
VWA3A	-1.30501811	1.89E-06
LRRC4B	-1.304848575	7.59E-18
APOL3	-1.304479432	5.18E-31
ZNF536	-1.303743359	9.35E-06
PLA2G3	-1.301857327	6.17E-07
GBP4	-1.301522403	2.76E-21
C11orf21	-1.301178828	4.97E-18
KCTD12	-1.300220804	8.00E-34
KIAA2012	-1.2997321	6.25E-06
TUBB6	-1.299371163	5.24E-29
FBXO15	-1.298658708	3.88E-14
ARHGEF37	-1.298141683	3.93E-23
DDO	-1.297846052	6.76E-19
PCDHGA12	-1.297321003	7.17E-22
KAZN	-1.296997291	3.33E-24
CCDC151	-1.296982148	6.42E-11
TSNAXIP1	-1.296034881	7.80E-12
ACACB	-1.294672342	4.19E-34
SGMS2	-1.294539681	1.36E-29
CFAP100	-1.29270863	1.59E-06
GPRC5A	-1.29200346	1.67E-20
PLPPR3	-1.291874881	1.39E-07
QRFPR	-1.291590737	0.000411875
CARD16	-1.291198386	1.04E-31
CCDC17	-1.28956508	5.93E-09
KIF1C	-1.289287157	3.63E-63
KMO	-1.288900111	3.75E-24
FRMD4A	-1.288667219	1.30E-50
MAL	-1.287772648	6.91E-14
HECW2	-1.285489172	2.09E-30
SLC27A3	-1.284944497	6.46E-35
NMBR	-1.283385337	1.02E-09
RILPL2	-1.282059078	6.39E-61
PPIL6	-1.281962324	6.31E-16
COL13A1	-1.280989785	8.39E-21
GLIPR1L2	-1.280938357	2.73E-19
GRAMD2A	-1.2787408	2.35E-17
ENPP2	-1.2779849	7.84E-27
APOBEC3A	-1.277012302	2.26E-12
ZFYVE9	-1.276369804	6.51E-46
CDKN2B	-1.275917079	3.92E-20
AL928654.3	-1.27588931	5.74E-10
ADAMTS4	-1.274307624	6.92E-13
ADARB2	-1.274088271	9.43E-10
KLHL32	-1.273912824	1.76E-14
WDR78	-1.273547083	2.09E-14
HCAR3	-1.271610153	1.26E-11
BTG2	-1.271228798	1.20E-22
ADGRL4	-1.270622355	2.22E-39
KLB	-1.266529592	2.44E-06
KIF6	-1.265549384	2.67E-11
FLVCR2	-1.26528308	6.89E-34
EHD2	-1.264774506	3.40E-29
ADGRD1	-1.264766188	2.42E-12
P2RX6	-1.26459628	3.21E-11
B3GALNT1	-1.264557655	1.50E-22
TSPAN12	-1.26408416	1.68E-29
TPSD1	-1.263953571	8.70E-07
PLEKHH2	-1.262683131	7.39E-19
NRGN	-1.260489909	2.42E-10
FCGR3A	-1.258703912	2.45E-20
FAM47E-STBD1	-1.257833996	3.85E-14
NCKAP1L	-1.257514799	5.75E-27
ADGRE5	-1.2572223	3.58E-34
HYAL2	-1.257198344	2.43E-59
RASSF8	-1.256992945	1.81E-20
RUNX1T1	-1.256726995	7.13E-20
CLDN11	-1.254864182	1.23E-11
PRF1	-1.254688649	3.17E-17
CXCL12	-1.253320802	3.31E-21
CAPS	-1.252515499	1.99E-12
CETP	-1.252373807	4.43E-32
SPRYD7	-1.251676624	1.22E-68
MAATS1	-1.247389979	1.50E-09
ZNF106	-1.246630597	7.24E-52
ABHD6	-1.245527684	1.25E-51
ACTG2	-1.244626243	7.36E-14
HLX	-1.24456006	1.74E-28
ALPL	-1.243082298	4.32E-09
SIRPA	-1.242735493	1.53E-31
IL34	-1.242657568	2.39E-16
DOCK11	-1.242387145	3.29E-28
PTGIS	-1.242306673	2.44E-14
PLA2G5	-1.241320332	7.95E-25
CLEC9A	-1.241016293	1.52E-13
PPM1F	-1.240965282	1.58E-70
EXOC3L1	-1.240528249	4.22E-39
LIPA	-1.240098497	1.61E-29
KIAA0040	-1.239853499	2.15E-61
CCL16	-1.239787652	4.97E-10
RIPOR1	-1.239286357	5.34E-44
BTNL3	-1.239090646	0.00113108
NEK10	-1.237930186	3.13E-09
INSC	-1.237518632	1.44E-06
WNT9A	-1.237481989	1.08E-21
DNAH6	-1.237293965	9.52E-09
PALD1	-1.237024445	1.36E-33
TRPC3	-1.235791311	3.99E-12
FAM184A	-1.235680938	8.63E-15
PEAK3	-1.235369793	1.50E-23
DIXDC1	-1.23496133	1.24E-47
EVI2B	-1.231576888	1.61E-27
TMEM220	-1.231561618	6.16E-22
BEX5	-1.22973722	1.53E-12
OR5K2	-1.227726705	4.28E-10
TTC28	-1.227396587	3.72E-38
PHEX	-1.227023183	1.00E-16
TCEAL7	-1.226944951	1.33E-20
C20orf194	-1.226793129	1.27E-52
FCER1G	-1.226125058	8.63E-24
ECM2	-1.225776177	1.92E-23
SIGLEC6	-1.225537456	1.17E-09
FAM180A	-1.223313921	6.49E-12
SIGLEC1	-1.221450231	4.63E-17
CCDC65	-1.221179493	3.41E-18
CDH23	-1.22105919	2.35E-18
MYLK	-1.220320461	7.84E-27
FOXF2	-1.220236037	1.39E-17
SIRPB2	-1.220186536	7.65E-23
PREX1	-1.219885148	6.53E-35
CBLN4	-1.219769509	1.19E-08
PZP	-1.219263108	2.78E-06
ARRB1	-1.217760179	1.25E-33
VSTM4	-1.21716296	1.66E-23
PCDH10	-1.216976023	8.29E-07
CLEC4D	-1.216616548	1.95E-11
SLC22A4	-1.215805056	2.14E-16
KIF19	-1.214388013	3.11E-07
BCL2A1	-1.214028805	6.17E-18
SERTAD1	-1.213518604	2.62E-31
RBMS2	-1.213252468	2.01E-56
LRCH2	-1.213210409	7.08E-14
GJA1	-1.211624221	1.82E-16
CFTR	-1.211169033	7.16E-08
SELENBP1	-1.210997429	6.43E-14
CCDC74B	-1.210277372	7.70E-10
DCDC1	-1.210271257	3.06E-07
UTF1	-1.20974593	5.99E-07
RASSF2	-1.207923657	3.84E-31
DCDC2	-1.206609598	7.40E-09
ATP13A4	-1.206034807	1.76E-08
SLC16A6	-1.205867643	1.32E-15
VGLL3	-1.205622409	1.26E-13
PIK3R5	-1.204176684	1.90E-26
LRRC4	-1.203396525	1.49E-11
STOM	-1.202556738	9.13E-40
EPM2A	-1.202206443	7.87E-59
CFAP47	-1.202131164	1.26E-05
FAM81B	-1.202126113	9.05E-08
FGF14	-1.201693596	2.69E-13
ITGAL	-1.201399406	1.83E-22
ENO4	-1.201082368	1.88E-11
SEMA3D	-1.200700947	2.66E-11
LSMEM2	-1.200231945	1.46E-09
TNNT3	-1.20004282	5.29E-06
JAM3	-1.200009359	2.20E-26
DNAJC5B	-1.199651468	5.11E-15
CCL18	-1.197253176	1.05E-09
OMG	-1.196051079	2.09E-07
CYGB	-1.195482397	1.95E-33
FAR2	-1.19529135	1.13E-18
GFI1B	-1.194007552	5.95E-06
GIPC3	-1.19262949	2.07E-26
LRRN4CL	-1.191628108	2.64E-14
TRH	-1.190207802	5.72E-05
POU1F1	-1.189275985	1.15E-09
C1orf198	-1.18876866	7.78E-50
PMP22	-1.188653349	6.73E-35
SIGLEC7	-1.188569546	1.84E-18
P2RX1	-1.186753231	2.20E-18
CTIF	-1.185899038	1.00E-48
CLEC12B	-1.185489742	7.89E-09
KCNJ8	-1.184602095	1.89E-15
ABCA10	-1.184300108	2.67E-11
MTURN	-1.183912011	1.98E-22
CALCOCO1	-1.183143185	3.86E-54
OR6T1	-1.183003391	0.028456395
AGTPBP1	-1.182927532	2.95E-58
CCNA1	-1.182741705	1.68E-06
TNFSF13	-1.182545361	2.33E-32
CDK15	-1.181654002	5.41E-14
RRAD	-1.18100839	1.34E-09
TNFSF12	-1.180905466	2.67E-39
WNT9B	-1.179356496	1.62E-10
KCNJ16	-1.179146047	1.95E-05
SPAG8	-1.178495609	4.77E-11
SULT1A1	-1.178455227	9.14E-21
SNX25	-1.178194744	8.23E-25
MS4A4A	-1.177339261	7.33E-19
MCC	-1.176657056	3.51E-22
VIM	-1.176371744	5.06E-30
STAB2	-1.175807967	7.45E-12
AOX1	-1.175620745	2.50E-09
CRHBP	-1.172874811	4.89E-13
TNFAIP8L3	-1.172603534	1.04E-21
BST1	-1.172205484	4.67E-20
SLCO4C1	-1.172073038	3.18E-09
SAMHD1	-1.171619824	3.02E-36
LATS2	-1.171596293	2.43E-56
ALDH2	-1.171309805	5.35E-24
CCND2	-1.171279926	1.25E-20
GRIN3B	-1.170819773	2.44E-08
ARMC3	-1.169557959	3.87E-07
IL20	-1.169353359	0.000168644
SNRK	-1.169134375	2.36E-75
ZNF331	-1.169098442	1.40E-27
ASGR1	-1.16895805	3.81E-17
SGK1	-1.168109339	5.12E-23
KIR2DL3	-1.166784676	2.87E-05
TMEM178A	-1.166550237	1.58E-09
PKD2L1	-1.16653407	1.59E-10
MYRIP	-1.165409706	1.51E-09
MRGPRF	-1.16532575	2.75E-18
CELF2	-1.165161645	2.34E-24
NATD1	-1.164695789	1.20E-33
STON1	-1.164485373	3.95E-26
ARG1	-1.164389742	2.72E-10
N4BP2L1	-1.1620703	4.00E-32
CD163	-1.161119066	3.48E-14
ABCA6	-1.160634646	3.10E-14
ZMYND15	-1.16015022	8.47E-25
ETS1	-1.160037485	8.63E-31
ITPKC	-1.159209361	2.24E-26
PYGM	-1.158517221	2.47E-16
PLAGL1	-1.158447938	6.18E-20
FAT4	-1.157715189	8.56E-14
COLGALT2	-1.156889263	2.72E-07
TRMT9B	-1.156369121	2.86E-12
SIAH3	-1.155994393	2.96E-08
PRDM11	-1.155486697	2.59E-41
MITF	-1.155355521	4.42E-28
PLEKHO2	-1.154607629	2.17E-40
COL4A4	-1.154522085	4.46E-14
FGD3	-1.154058636	1.09E-29
CCDC89	-1.154052267	2.28E-11
FAM43A	-1.152718932	5.44E-20
TPPP2	-1.152552421	1.73E-06
C5orf67	-1.15229776	1.99E-08
PTGFR	-1.152127395	9.98E-07
GNAQ	-1.151818334	1.56E-56
MEOX1	-1.151484402	5.49E-09
FBN3	-1.151274073	2.87E-05
DNAJB4	-1.151149798	1.66E-23
TSPAN32	-1.150596546	4.32E-15
C11orf16	-1.150250288	3.27E-06
OLFML2A	-1.149535076	3.09E-18
AK1	-1.149184216	1.88E-18
GPR162	-1.149045723	1.14E-14
PDZRN4	-1.147335111	3.30E-06
PCDHA12	-1.147284043	2.39E-08
SERINC1	-1.146209969	5.37E-82
LAPTM5	-1.146157891	1.68E-24
TEX14	-1.146005527	1.61E-17
ETV1	-1.145858495	1.02E-15
CHRM4	-1.145843707	5.59E-07
WNT2B	-1.145791919	5.06E-19
PPP1R16B	-1.14538482	1.71E-18
CAPN11	-1.14529552	1.50E-15
PKDCC	-1.144874351	4.63E-12
MGAM	-1.144784435	1.81E-08
ADGRL3	-1.144098736	4.51E-08
SORBS3	-1.143956591	2.91E-35
PPP5D1	-1.143820828	7.60E-26
NR5A2	-1.14347438	1.01E-16
SAMD5	-1.142977363	2.55E-11
RASGRP2	-1.142520733	8.21E-17
PRDM5	-1.141810098	2.49E-25
JUNB	-1.141699942	5.91E-25
NKD2	-1.140578956	6.45E-16
PER1	-1.139159876	2.35E-17
IHH	-1.138777078	0.000369915
CD69	-1.138737271	8.42E-14
CDH10	-1.137923538	0.00011548
ETV5	-1.13780022	2.16E-26
DNAAF3	-1.137209611	3.27E-09
TMEM236	-1.136239135	2.59E-11
ARAP2	-1.133352455	4.30E-26
ARHGAP30	-1.132858277	1.36E-28
ARHGAP29	-1.131789853	1.50E-23
TEF	-1.131286722	9.66E-24
PHF24	-1.130211585	6.35E-16
CRY2	-1.129251138	5.78E-36
ARRDC4	-1.128297182	7.37E-25
CDKL1	-1.12818569	3.82E-19
ID3	-1.127423641	6.93E-22
FMO3	-1.126769772	2.21E-14
ARHGAP18	-1.126630826	6.58E-39
EMILIN2	-1.125781665	1.67E-26
CT62	-1.124277299	2.37E-07
PKIG	-1.123520175	8.51E-23
C16orf71	-1.122219808	3.12E-12
VAMP2	-1.121967481	3.74E-44
NFATC1	-1.120115232	1.44E-32
ADCY9	-1.118649001	1.30E-24
ITPRID2	-1.116070941	1.21E-36
FHDC1	-1.113994618	8.38E-25
FAM187B	-1.112247902	2.07E-06
P2RY12	-1.110385567	6.51E-10
NELL2	-1.108666639	1.21E-10
HLA-DRB5	-1.107682232	3.05E-10
GGTLC1	-1.107070626	5.42E-05
GNGT2	-1.107060275	2.92E-20
KLF10	-1.106808503	5.69E-43
SRGAP2C	-1.106768704	4.97E-43
KLRG2	-1.106017358	2.93E-07
APOL4	-1.105772138	1.46E-16
DUSP8	-1.105622188	3.41E-22
SNTG2	-1.105479735	7.01E-06
ACSM5	-1.104806483	9.84E-10
SAMD14	-1.104615783	1.66E-22
SLA	-1.104591209	5.29E-21
MAP3K8	-1.104206513	3.67E-29
TNFAIP3	-1.103766289	6.71E-20
MRAS	-1.1029356	2.77E-39
PARD3B	-1.102574922	1.15E-25
MATK	-1.102196426	1.52E-15
C8orf34	-1.101888302	1.61E-08
HPS5	-1.101059586	2.73E-66
CD37	-1.100425316	8.85E-19
KAT2B	-1.100399656	1.66E-34
GPR65	-1.100235559	1.11E-18
AGPAT4	-1.100191711	3.07E-23
TCF4	-1.099414921	5.17E-23
PRND	-1.099257898	1.19E-05
GRP	-1.099063409	0.000419024
LIMD1	-1.098366331	1.41E-33
SPRY4	-1.097877258	1.86E-19
PPFIBP1	-1.097808927	3.80E-30
MEOX2	-1.097749786	5.58E-12
CCDC181	-1.097168815	1.34E-08
CLSTN2	-1.09669892	7.19E-09
PNMT	-1.096659297	3.30E-06
SCAI	-1.096443355	8.28E-31
DDR2	-1.096324487	8.89E-19
LRRC8C	-1.094669651	1.56E-30
MTMR10	-1.094448004	6.24E-47
CASC1	-1.094374799	1.96E-08
SYNE1	-1.09291158	7.79E-16
AC010255.3	-1.092740151	0.000998622
C1QC	-1.092670579	1.11E-14
TMEM255A	-1.091642085	8.17E-11
FAM241A	-1.091609159	4.73E-32
C5orf38	-1.091285966	9.53E-07
MYH1	-1.09064154	0.00028963
PCYOX1	-1.090196345	7.59E-44
CBFA2T3	-1.089800083	3.12E-14
DKK3	-1.089757773	6.56E-18
CPEB1	-1.088777004	1.33E-09
DOK7	-1.088306325	9.98E-10
TYRP1	-1.088024645	1.92E-07
SLC2A9	-1.087789984	2.73E-26
HEY2	-1.08776464	4.57E-16
SDC2	-1.086801078	2.43E-19
LPXN	-1.08527923	1.74E-31
ERICH2	-1.084502764	9.54E-12
IQCA1	-1.084406379	6.55E-09
DENND2C	-1.084374815	3.39E-20
COBL	-1.083248787	7.13E-13
PDZRN3	-1.08312266	6.68E-19
EFR3B	-1.082156411	3.06E-10
SMAD7	-1.081816932	8.08E-42
SCARF1	-1.081547138	2.97E-19
NLRP14	-1.081356513	3.35E-09
THEMIS2	-1.080395939	5.91E-29
TNS3	-1.079450997	6.64E-37
DAB2	-1.078467263	6.59E-26
CYP26B1	-1.077779308	1.40E-11
HCST	-1.077009943	1.51E-16
VASH1	-1.076687104	3.49E-31
HVCN1	-1.07666872	1.17E-29
GAS7	-1.076656354	4.92E-21
ARHGAP23	-1.076045429	3.89E-23
GCNT4	-1.075170466	3.64E-10
AKAP7	-1.07501694	5.87E-28
IL27	-1.074283085	1.25E-11
GUCA2A	-1.074225402	0.002814729
LCP1	-1.074204178	7.86E-20
RBM24	-1.074203773	1.32E-06
UCP1	-1.074202618	5.03E-05
INPP5K	-1.074165944	1.16E-57
NCR1	-1.072126358	3.43E-09
NME9	-1.072043202	1.90E-08
NRROS	-1.071482978	1.69E-21
EIF4E3	-1.071410546	3.89E-33
CSF3R	-1.070760244	2.16E-09
FRMD4B	-1.069999784	1.17E-34
OTULINL	-1.069770078	1.21E-10
CCDC78	-1.069428312	1.86E-07
KLHL41	-1.069086859	1.12E-08
JUN	-1.068415719	4.66E-22
KCNAB2	-1.068198404	5.77E-26
TUBA1A	-1.067964656	8.95E-21
SLC6A12	-1.0656199	2.06E-12
RIBC1	-1.065327244	5.35E-13
LRRC70	-1.065105135	7.61E-14
HPCAL1	-1.064849085	1.79E-31
PIFO	-1.064838734	1.45E-08
PODXL	-1.064410094	6.48E-30
LRRC74A	-1.064098042	2.38E-07
RERG	-1.063523505	6.60E-14
SLC2A3	-1.062937446	1.02E-12
SIDT2	-1.062745388	8.31E-50
ZBTB47	-1.062164865	7.87E-40
ARID5A	-1.060439723	5.78E-33
EPB41L3	-1.060288153	4.90E-16
MSMO1	-1.060196169	2.23E-27
MEIS1	-1.059828365	3.01E-21
CCDC146	-1.058179737	3.24E-11
PTPRD	-1.057981157	3.41E-12
UBL3	-1.057668993	7.48E-35
RUNDC3B	-1.05698698	5.93E-09
THRB	-1.056320959	8.42E-14
PLBD1	-1.056288568	3.51E-13
NKG7	-1.055991171	3.49E-10
NFKBIZ	-1.055955116	2.80E-15
ADGRF5	-1.055644271	4.44E-10
SCNN1G	-1.055531172	2.34E-07
RGS5	-1.054968024	9.13E-18
SLPI	-1.053357956	5.40E-06
SCN11A	-1.05260239	6.74E-11
CCDC114	-1.051971314	4.80E-07
NKD1	-1.051761539	7.92E-07
DAB2IP	-1.051156991	1.06E-34
S100A4	-1.050928597	9.13E-10
C1orf21	-1.050924217	1.13E-17
PXDC1	-1.050031428	3.18E-25
TMTC1	-1.049667615	1.25E-08
DAW1	-1.049645797	1.02E-05
LRRC25	-1.049512458	1.94E-17
C19orf38	-1.049491118	1.53E-16
DAPK1	-1.049254376	8.48E-19
DRAM1	-1.049195977	4.35E-14
ZC3H12B	-1.049068806	2.22E-16
SGCE	-1.048963311	1.39E-16
CRTAM	-1.048962277	2.44E-12
PALM2-AKAP2	-1.048745902	4.01E-12
BMX	-1.048724041	2.54E-05
RFPL3	-1.046917416	2.79E-06
DLEC1	-1.046911331	2.12E-06
ARL13B	-1.046819782	2.62E-49
TGFB2	-1.046517873	1.02E-09
PDZD4	-1.045977826	1.30E-08
LAIR1	-1.045866561	1.34E-17
CXCL16	-1.045272661	8.83E-27
SOD3	-1.044550356	7.34E-13
FCGR1B	-1.044316919	1.12E-13
THSD4	-1.044301141	1.34E-15
FHAD1	-1.044059417	8.63E-10
SRGN	-1.043013116	1.39E-14
ESYT3	-1.042917314	3.52E-10
CX3CL1	-1.042779744	6.57E-09
PDLIM1	-1.042160707	3.24E-39
ANKS1A	-1.042003836	7.62E-48
TTLL6	-1.041953368	1.09E-05
SERPINB10	-1.041163605	0.001443632
AMIGO1	-1.039284168	1.93E-21
C16orf54	-1.038982173	2.76E-13
PDPN	-1.038898032	1.55E-09
LCN10	-1.038449674	2.34E-05
MMP28	-1.038354384	1.09E-05
EFNB2	-1.035980156	7.63E-16
MYO1F	-1.034880219	1.24E-22
REPS2	-1.034466268	5.83E-17
HACD1	-1.034327254	3.51E-10
RGS16	-1.034297903	4.63E-15
UST	-1.034214456	3.49E-12
PRKCH	-1.033190892	1.20E-46
PXMP4	-1.032749798	6.53E-15
MAGI1	-1.032644708	5.63E-24
USP2	-1.032632344	1.23E-10
SCN3B	-1.030482998	9.15E-10
OASL	-1.030077359	1.34E-10
FCAR	-1.029936677	7.02E-06
RIC3	-1.029554195	4.12E-07
DOCK8	-1.028452319	6.70E-20
ARMCX1	-1.028150564	4.18E-24
ADA2	-1.02797036	7.24E-19
10-Mar	-1.027359614	2.77E-07
DOK6	-1.027014394	3.55E-09
BTG4	-1.026534655	0.000204942
LYZ	-1.026520678	9.49E-08
ARHGEF10	-1.025816509	3.83E-26
CDKL5	-1.025787622	5.54E-24
GNG7	-1.025589023	3.70E-16
SMIM10L2B	-1.025436913	2.36E-16
MOB3B	-1.024860313	4.33E-19
MAPK10	-1.024651927	2.34E-09
MICU3	-1.024498968	4.81E-17
ADAM33	-1.024233894	4.84E-08
BCO2	-1.02251607	2.77E-10
C12orf49	-1.021922956	3.80E-30
KCNB1	-1.021804318	6.21E-05
CDC14A	-1.021277714	1.18E-23
NMUR2	-1.020176144	0.001404004
TBC1D2	-1.019671231	1.07E-16
SYPL2	-1.019211448	1.78E-08
MID1IP1	-1.018541412	9.66E-24
CADM3	-1.018480435	3.16E-07
ASPRV1	-1.018373862	4.16E-21
CROCC2	-1.016958911	0.000129639
SLC18A2	-1.016784013	4.33E-08
SLC51B	-1.016081381	1.75E-05
BHLHE41	-1.01537102	6.81E-14
RTN4RL1	-1.015290142	1.12E-06
STAC3	-1.014731101	6.33E-24
KCNN3	-1.014416737	2.31E-13
HLA-DRA	-1.014124999	2.02E-13
PLCXD3	-1.0129593	2.20E-05
CCDC68	-1.012946503	4.54E-13
STX12	-1.012445231	7.57E-81
IZUMO1	-1.011716983	4.71E-08
FBXL7	-1.011288709	1.71E-17
ZPBP	-1.010741987	0.0002297
HLA-DOA	-1.010487021	1.07E-11
LEP	-1.010150768	0.003398981
CD53	-1.009973652	2.07E-18
IQUB	-1.009957001	1.18E-07
CA2	-1.009594946	1.15E-05
FERMT3	-1.009581453	3.19E-18
PIK3R1	-1.009516418	1.92E-28
IRF8	-1.008768242	4.45E-16
WNT2	-1.008333718	5.48E-11
MAP3K3	-1.007450294	2.34E-50
EPGN	-1.007131436	0.002281518
NAT8	-1.006829544	1.78E-05
DCHS1	-1.006616683	3.13E-18
EMP3	-1.006612645	7.02E-18
ITGA10	-1.006399409	5.55E-10
TWIST2	-1.005924123	1.40E-10
FCER2	-1.005855445	3.71E-05
SERTM2	-1.005460026	0.000805436
CTDSPL	-1.004940554	3.39E-32
CAMK2N1	-1.004761267	2.51E-09
RPGR	-1.004605861	1.90E-27
PCDHB4	-1.004152031	5.12E-15
TFRC	-1.004078215	1.20E-14
TRPC4	-1.002912921	5.88E-15
RGS18	-1.00277767	2.44E-12
TLCD2	-1.001706053	1.11E-20
RORA	-1.001269728	9.84E-15
INSIG1	-1.000852633	1.33E-24
PRCD	-1.000372108	1.82E-19
GAB2	-1.000362725	6.76E-25
HOMER3	1.000001213	8.33E-14
STAP2	1.000940478	5.87E-17
NUDT17	1.00140815	5.91E-17
DAP	1.001429612	4.23E-22
PRELID3A	1.001545294	2.55E-14
TMEM269	1.001710305	1.01E-05
ASIC3	1.003396426	7.07E-06
C1orf226	1.003575686	9.33E-12
YJEFN3	1.00395417	1.32E-06
C4orf45	1.004342103	0.011023121
GOT1	1.004446299	8.64E-15
RHNO1	1.004846884	4.72E-31
GDF6	1.005317848	0.010620612
GPR142	1.005392227	0.017509996
SLC35B2	1.00543884	4.03E-25
BCL2L12	1.005758186	3.68E-18
PCSK6	1.006070116	1.27E-07
POLE	1.006220116	5.19E-20
CHAC1	1.006512104	1.03E-08
MGST1	1.006662422	2.59E-10
BOLA2-SMG1P6	1.007737968	2.30E-14
B4GALT3	1.008152424	4.84E-29
PRSS37	1.008593929	0.004575461
RCC2	1.008696714	6.32E-29
CPE	1.008705733	2.88E-05
CCDC73	1.008713992	1.27E-09
SINHCAF	1.008807554	1.47E-14
AP3B2	1.009006727	0.000679201
STPG2	1.009400142	4.02E-06
TBC1D3L	1.009417306	4.74E-05
SPINK6	1.009660204	0.008911209
OAT	1.009977949	1.08E-12
PROX1	1.010922301	0.000148972
CPSF4L	1.011023034	0.000279972
DNAAF5	1.011436922	1.09E-27
DGKA	1.011983117	1.94E-17
ZNF587	1.012519547	6.28E-21
VPREB3	1.012869479	5.61E-05
CCDC24	1.013720252	5.47E-16
SGPL1	1.01426221	5.67E-36
TUBA1C	1.014660453	5.67E-17
DEPDC4	1.01492473	4.37E-17
GSR	1.015807648	2.13E-10
RRS1	1.015835149	9.65E-16
SYNE4	1.015917842	9.81E-11
GPR1	1.01594893	0.000254194
ITGB3	1.016213744	2.44E-05
PIDD1	1.016775533	1.31E-14
PGAM5	1.017570912	1.16E-21
PTRH2	1.017584346	3.70E-30
EIF2AK1	1.017708374	1.00E-37
PMEL	1.018053338	1.06E-11
SDHAF3	1.018198079	7.88E-17
KCTD13	1.019151538	1.01E-23
TRIM47	1.01978303	3.99E-15
CALU	1.01997493	7.98E-21
CTAGE15	1.022239844	0.004136398
BET1	1.022389722	2.90E-19
TENM3	1.02249576	8.13E-06
C17orf58	1.0230513	9.72E-21
PERP	1.023224079	1.18E-13
REEP2	1.02343041	1.18E-07
SLC35A2	1.023537152	7.80E-21
CADM4	1.023598749	2.10E-11
TMED6	1.023755653	0.000297601
PLEKHG2	1.024830998	3.15E-10
CDH1	1.025159177	5.90E-19
C11orf24	1.02520828	6.31E-25
KDELR2	1.025925958	4.69E-30
GPSM2	1.025939207	4.39E-17
CDK5RAP3	1.026164052	5.72E-20
KCNJ9	1.026389654	0.00250338
C1QTNF3	1.027215638	1.13E-05
IDO2	1.027516401	6.44E-06
MPHOSPH9	1.02782781	1.72E-18
NME2	1.02872636	3.40E-14
GPR89B	1.028925478	1.36E-23
THNSL1	1.029060424	2.74E-22
AC006978.2	1.030500568	0.000859275
RTEL1	1.030614152	3.46E-16
DOC2A	1.031258429	0.000502613
PCDHB2	1.031401053	7.47E-07
FAM186B	1.031413342	2.28E-11
VNN1	1.031804336	0.000437104
ACY1	1.03189458	5.29E-18
TAS1R1	1.032618549	0.000716153
ZNF714	1.033566181	7.57E-09
ZHX1-C8orf76	1.033567182	4.54E-15
CHPF2	1.034059676	2.10E-30
ALOX12B	1.034190379	0.000374594
EMC9	1.035748716	1.61E-18
CHST15	1.036147914	8.14E-17
WDR12	1.036759726	2.75E-31
PAPPA	1.03696377	4.28E-05
UFSP1	1.037179914	2.89E-12
FURIN	1.037508257	4.70E-07
MFSD9	1.038210005	7.63E-33
ATP2B2	1.038494373	0.0026473
CCDC58	1.039055645	1.22E-22
ABHD14A-ACY1	1.039570751	1.56E-10
ABCC12	1.040336195	0.006470355
CCL28	1.040690103	1.92E-06
BOLA2B	1.041176731	8.81E-10
CABP4	1.041211936	1.04E-05
ZMYND19	1.04135695	2.26E-28
RGS14	1.041480071	3.61E-19
ARHGAP39	1.041511671	4.23E-14
CDRT1	1.041605627	1.50E-05
LHX4	1.041741843	2.23E-09
TAF1D	1.041767121	1.59E-26
SEC61A2	1.041776537	2.98E-20
PPP2R3B	1.042062388	1.75E-17
CCDC137	1.042225199	7.54E-26
LYSMD1	1.042311432	6.77E-22
C1orf131	1.042323778	5.84E-47
COL18A1	1.042581766	2.50E-11
BEST2	1.042838788	0.006616074
SMUG1	1.04341333	8.31E-27
ZNF710	1.043999235	3.72E-09
VWA5B2	1.044077703	0.001471787
HPN	1.045175914	1.89E-06
GMPPA	1.045682663	1.70E-36
PLEKHS1	1.046014998	0.000754037
BICDL2	1.046499595	9.08E-11
SEC11C	1.046979667	9.81E-08
SPINK9	1.047397452	0.0012942
GCSH	1.047484507	6.84E-20
NDC1	1.047655083	4.96E-23
GABRD	1.047894444	3.00E-08
SRM	1.048009654	2.92E-21
CTLA4	1.048281023	6.31E-09
HDGF	1.048318743	3.85E-27
ALKBH6	1.048563025	5.55E-16
TRAF2	1.049254311	6.55E-20
ZNF257	1.049262626	5.19E-05
SPINT2	1.049628175	1.85E-17
CHAF1A	1.04980131	2.26E-21
MEIKIN	1.049948671	0.001462033
MYO16	1.049993964	0.000109479
MYL6B	1.050063518	1.01E-19
HPRT1	1.050103979	3.81E-20
KLK4	1.050444626	0.00449645
CLK2	1.05072033	1.31E-29
B4GALT4	1.050852888	1.09E-18
CHAC2	1.051018351	2.83E-14
STMN1	1.051855741	2.69E-11
VWC2L	1.052074824	0.014415135
PPIL1	1.05306983	5.11E-23
SLC7A2	1.053361941	0.000443639
SLC16A1	1.053550428	5.41E-06
TRIM29	1.053680613	0.00432818
CHMP4C	1.0538527	1.14E-16
TMEM106C	1.05400996	5.78E-16
CCNL2	1.054487006	1.27E-14
NSUN2	1.054494219	1.20E-27
PLXNA3	1.054768862	4.65E-17
DUSP23	1.055560895	3.30E-11
UTP25	1.055753858	1.01E-38
SLC6A7	1.055832807	1.43E-06
MRPL3	1.056004315	1.69E-35
C5orf58	1.056747644	7.27E-06
KIAA0319	1.057002171	0.000590824
DSN1	1.05710935	4.08E-24
XPO5	1.057258278	1.38E-31
FSCN2	1.057336052	8.00E-09
REXO5	1.057377285	5.92E-19
ZNF92	1.057497327	1.04E-24
TP63	1.057501738	0.000763685
ZNF793	1.057662181	4.23E-10
FST	1.057839049	0.000717772
CCDC87	1.05790328	7.90E-10
TUBA4A	1.058281832	1.12E-13
NCAPD2	1.058637455	1.40E-17
NME1-NME2	1.059669761	8.83E-10
CNPY2	1.060071753	4.43E-26
CENPO	1.060691485	4.78E-22
ERBB2	1.060704034	7.96E-12
TM6SF2	1.060722004	6.06E-08
GET4	1.061754492	1.92E-23
BRSK1	1.062705218	2.15E-09
OAZ3	1.0631782	2.16E-16
MMACHC	1.063586546	3.53E-35
MMP15	1.063845886	3.35E-12
PDZK1	1.063991244	7.17E-07
PCDHA11	1.064053106	8.96E-06
PDIA6	1.064264082	1.89E-23
SCART1	1.064557157	7.52E-07
[truncated: 3,524 more rows]
