# Supplementary material for: Application of miRNA Biomarkers in Predicting Overall Survival Outcomes for Lung Adenocarcinoma
Source: Biomed Res Int. 2022 Sep 12;2022:5249576. doi: 10.1155/2022/5249576 (PMC9485713; doi:10.1155/2022/5249576)
Supplement: Supplementary 2 — Table S2: differentially expressed miRNAs. [file 5249576.f2.txt]

miRNA	logFC	FDR
hsa-miR-486-5p	-3.750432707	3.96E-113
hsa-miR-139-3p	-3.29385576	1.24E-112
hsa-let-7d-3p	-2.209917084	1.45E-102
hsa-miR-30c-2-3p	-2.875686178	1.26E-98
hsa-miR-144-5p	-3.373733839	1.21E-88
hsa-miR-30a-3p	-2.623654008	9.19E-82
hsa-miR-143-3p	-2.645798774	4.10E-81
hsa-miR-195-5p	-2.308794881	2.26E-79
hsa-miR-144-3p	-3.107401987	8.52E-71
hsa-miR-197-3p	-2.036892371	3.25E-68
hsa-miR-4732-3p	-3.679362384	5.99E-68
hsa-miR-451a	-2.94697281	6.21E-63
hsa-miR-378a-3p	-1.952773842	1.73E-57
hsa-miR-210-3p	5.038442131	1.26E-56
hsa-miR-218-5p	-1.859428245	3.72E-53
hsa-let-7b-3p	-1.509411262	6.92E-52
hsa-miR-190a-5p	-2.164721902	3.28E-51
hsa-miR-145-3p	-1.66093937	8.06E-51
hsa-miR-6892-5p	-2.21578714	4.21E-50
hsa-miR-374a-5p	-1.57171146	2.38E-49
hsa-miR-328-3p	-2.054005628	7.27E-48
hsa-miR-218-1-3p	-2.047017683	8.75E-48
hsa-let-7a-5p	-1.684276213	1.01E-46
hsa-let-7c-5p	-1.824700023	1.93E-45
hsa-miR-423-5p	-1.602863847	3.29E-45
hsa-let-7g-3p	2.419227811	5.06E-41
hsa-miR-96-5p	2.72266547	5.59E-40
hsa-miR-140-3p	-1.345978793	1.47E-39
hsa-let-7f-5p	-1.957208595	1.17E-38
hsa-miR-21-3p	2.023173366	1.17E-38
hsa-miR-1287-3p	3.472438485	2.35E-38
hsa-miR-708-3p	2.683172477	4.90E-38
hsa-miR-30a-5p	-1.860977212	8.65E-37
hsa-miR-708-5p	2.822397539	1.23E-35
hsa-miR-7-1-3p	1.81396059	2.73E-35
hsa-miR-1-3p	-2.359006109	5.49E-35
hsa-miR-139-5p	-1.775335393	1.48E-33
hsa-miR-126-5p	-1.429116322	4.59E-32
hsa-miR-183-5p	2.377241057	4.81E-32
hsa-miR-150-3p	-2.029037598	1.11E-31
hsa-miR-301a-5p	3.941986909	4.43E-31
hsa-miR-153-5p	4.435192569	7.41E-31
hsa-miR-133b	-2.385425593	1.02E-29
hsa-miR-671-5p	2.130284296	1.34E-29
hsa-miR-182-5p	2.081886709	5.13E-29
hsa-miR-1976	-1.315968803	9.32E-29
hsa-miR-6511b-3p	-1.920338906	1.15E-28
hsa-miR-374b-5p	-1.075617809	1.46E-28
hsa-let-7g-5p	-1.149710403	5.26E-28
hsa-miR-21-5p	1.680283412	5.35E-28
hsa-miR-26b-3p	1.555346016	7.89E-28
hsa-miR-26a-5p	-1.173320417	1.22E-27
hsa-miR-378c	-1.538191267	1.41E-27
hsa-miR-33a-5p	2.67583056	1.65E-27
hsa-miR-27a-5p	-1.618649249	2.75E-26
hsa-miR-101-3p	-1.310802944	5.23E-26
hsa-miR-184	-2.864315442	9.85E-26
hsa-miR-33b-5p	3.096901337	1.31E-25
hsa-miR-598-3p	-1.467909387	5.49E-25
hsa-let-7b-5p	-1.193947971	8.02E-25
hsa-miR-151a-5p	1.219234752	1.75E-24
hsa-miR-135b-5p	2.819384613	2.33E-24
hsa-miR-133a-3p	-1.997357056	3.65E-24
hsa-miR-1307-5p	2.283842971	3.80E-24
hsa-miR-200a-5p	1.98630853	4.42E-24
hsa-miR-4668-3p	2.443358506	6.65E-24
hsa-miR-20a-3p	2.064074725	8.72E-24
hsa-miR-143-5p	2.20421259	2.14E-23
hsa-miR-577	4.981265767	2.21E-23
hsa-miR-301a-3p	2.126510683	3.62E-23
hsa-miR-409-5p	3.707395534	4.43E-23
hsa-miR-605-5p	-2.045697683	4.96E-23
hsa-miR-141-5p	1.791430181	1.32E-22
hsa-miR-142-3p	2.145436458	1.56E-22
hsa-miR-130b-5p	1.883031349	3.87E-22
hsa-miR-744-3p	1.909430089	6.85E-22
hsa-miR-378a-5p	-1.224199983	8.49E-22
hsa-miR-9-5p	4.845808373	9.28E-22
hsa-miR-503-5p	2.598833878	9.74E-22
hsa-miR-147b-3p	4.257981783	1.40E-21
hsa-miR-1247-3p	-2.108323215	4.18E-21
hsa-miR-183-3p	2.860749993	4.25E-21
hsa-let-7e-5p	-1.257185326	1.26E-20
hsa-miR-125b-2-3p	-1.327611948	1.34E-20
hsa-miR-29b-1-5p	1.997792039	1.72E-20
hsa-miR-486-3p	-2.052146914	1.99E-20
hsa-miR-590-5p	1.400543914	2.52E-20
hsa-miR-196a-5p	6.1701059	2.94E-20
hsa-miR-127-5p	2.526199431	3.24E-20
hsa-miR-2110	-1.549228288	3.44E-20
hsa-miR-194-3p	-2.771246997	3.77E-20
hsa-miR-345-5p	1.920689968	1.38E-19
hsa-miR-135b-3p	2.756709603	1.40E-19
hsa-miR-1296-5p	-1.372761607	2.45E-19
hsa-miR-29a-5p	1.52679866	4.75E-19
hsa-miR-616-5p	2.998171754	6.85E-19
hsa-miR-93-3p	1.410913421	1.96E-18
hsa-miR-200a-3p	1.997731433	2.75E-18
hsa-miR-301b-3p	3.257612376	3.03E-18
hsa-miR-532-3p	-1.315875113	3.18E-18
hsa-miR-130b-3p	1.636778156	5.21E-18
hsa-miR-141-3p	1.57240387	1.67E-17
hsa-miR-450a-5p	1.864443066	2.73E-17
hsa-miR-31-5p	4.906995774	3.98E-17
hsa-miR-93-5p	1.233263118	1.27E-16
hsa-miR-340-5p	-1.320945367	2.10E-16
hsa-miR-3170	2.504935855	2.37E-16
hsa-miR-148a-3p	1.330176431	3.17E-16
hsa-miR-301b-5p	4.300403895	5.99E-16
hsa-miR-195-3p	-1.019762441	8.81E-16
hsa-miR-136-5p	2.324698825	1.23E-15
hsa-miR-425-5p	1.146204315	1.32E-15
hsa-miR-19b-1-5p	1.174806204	2.32E-15
hsa-miR-6502-5p	-1.651331512	3.01E-15
hsa-miR-629-3p	1.899955712	3.26E-15
hsa-miR-338-5p	-1.549209341	3.52E-15
hsa-miR-4521	-1.715652895	4.30E-15
hsa-miR-424-5p	1.579056919	6.96E-15
hsa-miR-155-3p	3.011635946	8.54E-15
hsa-miR-29b-3p	1.351332085	1.08E-14
hsa-miR-324-5p	1.274771311	1.09E-14
hsa-miR-589-3p	1.805525877	1.74E-14
hsa-miR-539-5p	3.303430404	1.74E-14
hsa-miR-145-5p	-1.002518064	3.30E-14
hsa-miR-224-5p	2.227363122	3.45E-14
hsa-miR-548v	2.325087257	5.26E-14
hsa-miR-188-3p	2.216868691	5.46E-14
hsa-let-7a-2-3p	2.146251241	5.49E-14
hsa-miR-9-3p	3.997125876	7.79E-14
hsa-miR-504-5p	-1.679182512	1.02E-13
hsa-miR-3136-5p	2.307027246	1.43E-13
hsa-miR-31-3p	3.845728412	1.51E-13
hsa-miR-199a-5p	1.145849189	1.55E-13
hsa-miR-625-5p	1.307916521	3.24E-13
hsa-miR-4652-5p	4.862332588	4.34E-13
hsa-miR-196b-5p	3.435363614	4.37E-13
hsa-miR-223-3p	-1.156847676	5.77E-13
hsa-miR-17-5p	1.100587072	1.30E-12
hsa-miR-335-5p	-1.041208038	1.76E-12
hsa-miR-137-3p	4.418842853	2.76E-12
hsa-miR-200c-5p	1.165881125	5.26E-12
hsa-miR-429	1.342566417	6.50E-12
hsa-miR-221-5p	-1.405979049	8.35E-12
hsa-miR-34a-3p	1.42528489	9.39E-12
hsa-miR-1258	-1.520797256	1.13E-11
hsa-miR-193b-3p	1.57754673	1.13E-11
hsa-miR-1294	-1.439091388	1.15E-11
hsa-miR-6720-3p	-1.437386891	1.32E-11
hsa-miR-1247-5p	-1.577937075	1.34E-11
hsa-miR-105-5p	6.861246622	1.80E-11
hsa-miR-5187-5p	-1.158941914	4.28E-11
hsa-miR-1269a	5.34601601	5.29E-11
hsa-miR-323b-3p	3.475749757	5.53E-11
hsa-miR-103a-2-5p	1.92032486	6.40E-11
hsa-miR-887-5p	-1.39022349	6.52E-11
hsa-miR-616-3p	2.124263729	9.14E-11
hsa-miR-3189-3p	3.160472232	1.30E-10
hsa-miR-3199	-1.014432963	1.84E-10
hsa-miR-192-5p	2.875395227	2.31E-10
hsa-miR-1277-3p	1.858041467	2.69E-10
hsa-miR-181b-3p	1.016427589	2.85E-10
hsa-miR-187-3p	2.389079863	3.06E-10
hsa-miR-19a-3p	1.323795688	3.29E-10
hsa-miR-2277-5p	1.961498585	5.09E-10
hsa-miR-490-3p	-2.174538435	5.41E-10
hsa-miR-326	-1.130382913	8.18E-10
hsa-miR-579-5p	2.00199778	8.54E-10
hsa-miR-214-5p	1.038875518	8.54E-10
hsa-miR-181b-2-3p	1.256172487	9.25E-10
hsa-miR-550a-5p	1.248157251	1.43E-09
hsa-miR-377-3p	2.433632355	1.58E-09
hsa-miR-20b-3p	2.749100726	1.69E-09
hsa-miR-1301-3p	1.067153058	2.63E-09
hsa-miR-767-5p	6.262568923	2.67E-09
hsa-miR-4724-5p	1.961658279	4.01E-09
hsa-miR-4638-3p	1.92798299	4.38E-09
hsa-miR-4777-3p	-1.17101483	4.75E-09
hsa-miR-511-3p	-1.124069825	8.52E-09
hsa-miR-592	1.64880175	8.62E-09
hsa-miR-215-5p	3.063088822	9.04E-09
hsa-miR-194-5p	2.488468504	1.01E-08
hsa-miR-584-5p	-1.108869319	1.15E-08
hsa-miR-499a-5p	-1.368926121	1.24E-08
hsa-miR-3917	-1.172068503	1.47E-08
hsa-miR-937-3p	1.854613608	1.50E-08
hsa-miR-372-3p	7.244807979	1.51E-08
hsa-miR-3912-3p	-1.034976675	1.53E-08
hsa-miR-4788	5.170318999	1.54E-08
hsa-miR-365a-5p	2.224221077	2.19E-08
hsa-miR-455-3p	1.081141816	2.21E-08
hsa-miR-205-5p	2.745019257	2.29E-08
hsa-miR-758-3p	1.69323891	2.43E-08
hsa-miR-3617-3p	2.633226776	2.92E-08
hsa-miR-26a-1-3p	1.645586898	3.00E-08
hsa-miR-551b-3p	1.893947128	3.72E-08
hsa-miR-675-3p	3.268556488	4.00E-08
hsa-miR-767-3p	5.196294374	4.67E-08
hsa-miR-493-3p	1.59657812	4.98E-08
hsa-miR-1269b	6.181384391	5.78E-08
hsa-miR-323a-3p	2.585443026	5.91E-08
hsa-miR-4766-3p	2.232164103	6.43E-08
hsa-miR-4664-3p	2.474659919	7.93E-08
hsa-miR-6744-3p	3.725535297	8.29E-08
hsa-miR-1248	2.634953697	9.68E-08
hsa-miR-3194-5p	2.594616494	1.08E-07
hsa-miR-891a-5p	2.68193971	1.16E-07
hsa-miR-6815-3p	2.248299991	1.31E-07
hsa-miR-130a-5p	1.457428108	1.33E-07
hsa-miR-653-5p	1.81270954	1.61E-07
hsa-miR-3677-3p	1.129519665	2.19E-07
hsa-miR-376b-3p	2.060620468	2.26E-07
hsa-miR-556-3p	1.766225396	2.70E-07
hsa-miR-217-5p	1.705898366	2.98E-07
hsa-miR-7705	1.25426287	3.48E-07
hsa-miR-381-5p	2.257890969	3.71E-07
hsa-miR-1293	3.491072456	4.12E-07
hsa-miR-382-5p	1.321096692	4.35E-07
hsa-miR-545-5p	1.704066988	4.89E-07
hsa-miR-491-3p	1.425528696	4.91E-07
hsa-miR-628-5p	1.173417498	5.80E-07
hsa-miR-542-5p	1.050499762	6.07E-07
hsa-miR-431-5p	2.483230441	6.25E-07
hsa-miR-1251-5p	3.101273506	7.05E-07
hsa-miR-154-3p	1.77325866	7.60E-07
hsa-miR-4661-5p	1.156089902	7.60E-07
hsa-miR-3664-5p	2.096335602	7.60E-07
hsa-miR-450b-5p	1.104364087	7.62E-07
hsa-miR-6728-5p	2.106162355	7.94E-07
hsa-miR-570-3p	1.867238915	1.00E-06
hsa-miR-6820-3p	-1.055300646	1.01E-06
hsa-miR-503-3p	1.832337274	1.05E-06
hsa-miR-487a-3p	2.389337048	1.07E-06
hsa-miR-375-3p	1.51012526	1.18E-06
hsa-miR-4536-3p	-1.168623762	1.33E-06
hsa-miR-122-5p	6.124359471	1.36E-06
hsa-miR-23a-5p	-1.029082448	1.41E-06
hsa-miR-409-3p	1.393823962	1.47E-06
hsa-miR-134-5p	1.32278798	1.49E-06
hsa-miR-371a-5p	7.276379248	1.82E-06
hsa-miR-138-5p	-1.121601258	1.88E-06
hsa-miR-6510-3p	2.082926658	2.05E-06
hsa-miR-5698	1.76013676	2.26E-06
hsa-miR-345-3p	1.50134436	2.28E-06
hsa-miR-889-3p	1.52377909	2.40E-06
hsa-miR-449b-5p	3.546045909	2.58E-06
hsa-miR-154-5p	1.371137797	2.69E-06
hsa-miR-106a-5p	1.091908036	2.70E-06
hsa-miR-5683	-1.135192664	2.75E-06
hsa-miR-5571-3p	1.964931036	2.84E-06
hsa-miR-556-5p	1.826594224	2.87E-06
hsa-miR-3662	2.103137962	3.42E-06
hsa-miR-548au-3p	1.602217379	3.57E-06
hsa-miR-493-5p	1.247645467	3.59E-06
hsa-miR-449c-5p	3.213085497	3.83E-06
hsa-miR-618	-1.111501415	4.09E-06
hsa-miR-489-5p	3.024757499	4.24E-06
hsa-miR-487b-3p	1.473598415	4.30E-06
hsa-miR-6803-3p	-1.142252025	4.32E-06
hsa-miR-489-3p	2.26626338	5.45E-06
hsa-miR-3940-3p	-1.160830493	5.58E-06
hsa-miR-373-3p	5.448737466	6.24E-06
hsa-miR-378d	-1.017769833	6.60E-06
hsa-miR-1229-3p	1.718889572	6.60E-06
hsa-miR-548y	3.80904809	6.98E-06
hsa-miR-6860	2.646598593	7.49E-06
hsa-miR-186-3p	1.453345104	8.28E-06
hsa-miR-4473	1.349393841	8.45E-06
hsa-miR-6850-5p	2.843073431	1.05E-05
hsa-miR-153-3p	1.304415566	1.12E-05
hsa-miR-639	1.233679864	1.17E-05
hsa-miR-615-3p	2.207519372	1.81E-05
hsa-miR-205-3p	2.684831522	1.93E-05
hsa-miR-431-3p	1.616367528	2.00E-05
hsa-miR-548s	1.403063598	2.27E-05
hsa-miR-211-5p	-1.484972173	2.49E-05
hsa-miR-216b-5p	2.47140165	2.53E-05
hsa-miR-206	-1.847047358	2.74E-05
hsa-miR-219a-5p	1.052603557	2.78E-05
hsa-miR-203b-3p	1.155152877	3.11E-05
hsa-miR-224-3p	1.018004599	5.06E-05
hsa-miR-371a-3p	5.383437858	5.37E-05
hsa-miR-551a	1.321230057	6.68E-05
hsa-miR-3127-3p	1.870560452	8.38E-05
hsa-miR-34c-3p	-1.10845558	8.79E-05
hsa-miR-7112-3p	2.28507912	0.000112125
hsa-miR-4443	1.331773046	0.000114648
hsa-miR-561-5p	1.282558758	0.000132147
hsa-miR-376c-5p	1.475380486	0.000135213
hsa-miR-514b-5p	2.873782023	0.000140601
hsa-miR-3161	2.587371486	0.000149843
hsa-miR-449a	1.980446046	0.000150187
hsa-miR-495-3p	1.1823076	0.000152004
hsa-miR-6715a-3p	2.317487836	0.000155466
hsa-miR-5581-3p	1.200265658	0.00016212
hsa-miR-552-5p	2.340646958	0.00016577
hsa-miR-496	1.233567985	0.000166783
hsa-miR-376a-3p	1.607623784	0.00017303
hsa-miR-376b-5p	1.468497194	0.000193881
hsa-miR-134-3p	1.370344207	0.000194911
hsa-miR-376a-5p	1.575963826	0.000201832
hsa-miR-6781-3p	1.42309907	0.000220208
hsa-miR-369-3p	1.149510069	0.0002233
hsa-miR-662	2.443004803	0.000226039
hsa-miR-20b-5p	1.108748041	0.00029405
hsa-miR-370-3p	1.225698385	0.00029405
hsa-miR-4658	1.925394554	0.00029405
hsa-miR-3176	1.410385733	0.00029406
hsa-miR-4326	1.168753167	0.00030537
hsa-miR-632	1.19481214	0.000324761
hsa-miR-412-5p	1.301506528	0.000364814
hsa-miR-892a	2.637915115	0.000367192
hsa-miR-432-5p	1.193967714	0.000406386
hsa-miR-4645-3p	1.020137425	0.000409011
hsa-miR-513c-5p	2.176257944	0.000411296
hsa-miR-5001-3p	1.025700369	0.000426657
hsa-miR-449b-3p	2.353087675	0.000515451
hsa-miR-216a-3p	2.30750715	0.000569491
hsa-miR-494-3p	1.228682837	0.000649616
hsa-miR-643	1.022716714	0.000688155
hsa-miR-485-5p	-1.24376036	0.000717693
hsa-miR-655-3p	1.028830519	0.000734244
hsa-miR-5699-3p	1.35792166	0.000753489
hsa-miR-219b-3p	1.002244932	0.000804677
hsa-miR-539-3p	1.443522815	0.000889787
hsa-miR-548f-3p	2.206026207	0.000936381
hsa-miR-146a-3p	1.942515536	0.000973144
hsa-miR-1911-5p	2.691570131	0.000981615
hsa-miR-4454	1.491093165	0.001003852
hsa-miR-1291	1.030886067	0.001031412
hsa-miR-34b-3p	-1.007658072	0.001073172
hsa-miR-296-3p	1.092644098	0.001109612
hsa-miR-410-3p	1.06757365	0.001124864
hsa-miR-653-3p	1.294653076	0.00125326
hsa-miR-3174	1.059793234	0.001337175
hsa-miR-519a-5p	2.118589011	0.001565917
hsa-miR-509-3p	1.420714875	0.00160928
hsa-miR-4784	-1.090294971	0.002387903
hsa-miR-543	1.271917864	0.002459755
hsa-miR-656-3p	1.023295215	0.003433379
hsa-miR-636	1.097536966	0.003553821
hsa-miR-512-3p	3.268325611	0.00370577
hsa-miR-518f-5p	3.83942001	0.004028298
hsa-miR-541-3p	1.579068709	0.004246807
hsa-miR-541-5p	2.26869241	0.004538391
hsa-miR-873-5p	1.621963251	0.004719445
hsa-miR-552-3p	1.724593458	0.005629027
hsa-miR-934	1.399469796	0.005972186
hsa-miR-5708	1.141022954	0.007684344
hsa-miR-483-5p	1.598177657	0.013447748
hsa-miR-508-3p	1.035015118	0.013555214
hsa-miR-34b-5p	1.029145989	0.015020363
hsa-miR-520g-3p	2.475043032	0.016541834
hsa-miR-192-3p	1.062368525	0.017795191
hsa-miR-517b-3p	-1.473243445	0.020057537
hsa-miR-517a-3p	-1.468794175	0.020523912
hsa-miR-6783-3p	1.051044532	0.021204037
hsa-miR-135a-3p	1.470315883	0.026018392
hsa-miR-124-3p	1.740332236	0.028918454
hsa-miR-1304-3p	1.16921789	0.029392446
hsa-miR-520h	2.103495619	0.034010618
hsa-miR-522-3p	1.535920951	0.049327868
hsa-miR-219a-2-3p	1.463812382	0.049940025
