# Supplementary material for: Application of miRNA Biomarkers in Predicting Overall Survival Outcomes for Lung Adenocarcinoma
Source: Biomed Res Int. 2022 Sep 12;2022:5249576. doi: 10.1155/2022/5249576 (PMC9485713; doi:10.1155/2022/5249576)
Supplement: Supplementary 3 — Table S3: the results of univariate Cox analysis. [file 5249576.f3.txt]

miRNA	Pvalue
hsa.let.7g.3p	0.03799
hsa.miR.101.3p	0.02856
hsa.miR.1293	0.00958
hsa.miR.133a.3p	0.03796
hsa.miR.148a.3p	0.01101
hsa.miR.31.3p	0.04393
hsa.miR.3677.3p	0.04332
hsa.miR.4645.3p	0.03993
hsa.miR.5001.3p	0.02872
hsa.miR.550a.5p	0.01037
hsa.miR.584.5p	0.02035
hsa.miR.873.5p	0.03342
