# Supplementary material for: Application of miRNA Biomarkers in Predicting Overall Survival Outcomes for Lung Adenocarcinoma
Source: Biomed Res Int. 2022 Sep 12;2022:5249576. doi: 10.1155/2022/5249576 (PMC9485713; doi:10.1155/2022/5249576)
Supplement: Supplementary 4 — Table S4: online databases to predicted 42 target genes of these seven miRNAs. [file 5249576.f4.txt]

miRNA	gene
hsa-miR-873-5p	AOC3
hsa-miR-873-5p	AOC3
hsa-miR-873-5p	CCT6A
hsa-miR-873-5p	CDCA7
hsa-miR-873-5p	CDK5R1
hsa-miR-873-5p	DAB2IP
hsa-miR-873-5p	DAB2IP
hsa-miR-873-5p	EGLN3
hsa-miR-873-5p	EGLN3
hsa-miR-873-5p	FOXA1
hsa-miR-873-5p	GPRC5A
hsa-miR-873-5p	HDGF
hsa-miR-873-5p	HDGF
hsa-miR-873-5p	HOXC8
hsa-miR-873-5p	HOXC8
hsa-miR-873-5p	KLF6
hsa-miR-873-5p	KLF6
hsa-miR-873-5p	LDLR
hsa-miR-873-5p	LDLR
hsa-miR-873-5p	LIMD1
hsa-miR-873-5p	LIMD1
hsa-miR-873-5p	MEIS1
hsa-miR-873-5p	MKI67
hsa-miR-873-5p	MKI67
hsa-miR-873-5p	NPTX1
hsa-miR-873-5p	NXPH3
hsa-miR-873-5p	NXPH3
hsa-miR-873-5p	PAPSS2
hsa-miR-873-5p	PAPSS2
hsa-miR-873-5p	PPIL1
hsa-miR-873-5p	RASSF8
hsa-miR-873-5p	RASSF8
hsa-miR-873-5p	RCC2
hsa-miR-873-5p	RCC2
hsa-miR-873-5p	RGS17
hsa-miR-873-5p	RGS17
hsa-miR-873-5p	RNF43
hsa-miR-873-5p	S1PR1
hsa-miR-873-5p	S1PR1
hsa-miR-873-5p	SCAI
hsa-miR-873-5p	SCAI
hsa-miR-873-5p	SGK1
hsa-miR-873-5p	SGK1
hsa-miR-873-5p	SGMS2
hsa-miR-873-5p	SGMS2
hsa-miR-873-5p	SIRPA
hsa-miR-873-5p	SIRPA
hsa-miR-873-5p	STK32A
hsa-miR-873-5p	TGFA
hsa-miR-873-5p	TGFB2
hsa-miR-873-5p	TGFB2
hsa-miR-873-5p	TMEM151B
hsa-miR-873-5p	TMEM151B
hsa-miR-873-5p	VASH1
hsa-miR-873-5p	VASH1
hsa-miR-873-5p	WNT1
hsa-miR-873-5p	WNT10B
hsa-miR-873-5p	WNT10B
hsa-miR-873-5p	ZEB1
hsa-miR-873-5p	ZEB1
hsa-miR-584-5p	CDK5R1
hsa-miR-584-5p	DNAJB4
hsa-miR-584-5p	DNAJB4
hsa-miR-584-5p	FOXA1
hsa-miR-584-5p	FOXA1
hsa-miR-584-5p	HOXC8
hsa-miR-584-5p	HOXC8
hsa-miR-584-5p	KLF6
hsa-miR-584-5p	KLF6
hsa-miR-584-5p	MEIS1
hsa-miR-584-5p	NPTX1
hsa-miR-584-5p	PCP4L1
hsa-miR-584-5p	PCP4L1
hsa-miR-584-5p	PPIL1
hsa-miR-584-5p	PPIL1
hsa-miR-584-5p	RGS17
hsa-miR-584-5p	RGS17
hsa-miR-584-5p	SCAI
hsa-miR-584-5p	SCAI
hsa-miR-584-5p	SIRPA
hsa-miR-584-5p	STARD13
hsa-miR-584-5p	STARD13
hsa-miR-584-5p	STK32A
hsa-miR-584-5p	STK32A
hsa-miR-584-5p	TGFA
hsa-miR-584-5p	TGFB2
hsa-miR-584-5p	TGFB2
hsa-miR-584-5p	TRIM59
hsa-miR-584-5p	TRIM59
hsa-miR-584-5p	ZEB1
hsa-miR-584-5p	ZEB1
hsa-miR-550a-5p	CDCA7
hsa-miR-550a-5p	DNAJB4
hsa-miR-550a-5p	KLF6
hsa-miR-550a-5p	LIMD1
hsa-miR-550a-5p	MKI67
hsa-miR-550a-5p	NXPH3
hsa-miR-550a-5p	PCP4L1
hsa-miR-550a-5p	RCC2
hsa-miR-550a-5p	RGS17
hsa-miR-550a-5p	RNF43
hsa-miR-550a-5p	S1PR1
hsa-miR-550a-5p	SECISBP2L
hsa-miR-550a-5p	STARD13
hsa-miR-550a-5p	STK32A
hsa-miR-550a-5p	TGFB2
hsa-miR-550a-5p	TMEM151B
hsa-miR-550a-5p	TRIM59
hsa-miR-550a-5p	WNT10B
hsa-miR-5001-3p	CCT6A
hsa-miR-5001-3p	CDK5R1
hsa-miR-5001-3p	DAB2IP
hsa-miR-5001-3p	DNAJB4
hsa-miR-5001-3p	GPRC5A
hsa-miR-5001-3p	KLF6
hsa-miR-5001-3p	LDLR
hsa-miR-5001-3p	LIMD1
hsa-miR-5001-3p	MEIS1
hsa-miR-5001-3p	MKI67
hsa-miR-5001-3p	NPTX1
hsa-miR-5001-3p	NXPH3
hsa-miR-5001-3p	PCP4L1
hsa-miR-5001-3p	PPIL1
hsa-miR-5001-3p	RCC2
hsa-miR-5001-3p	RGS17
hsa-miR-5001-3p	RNF43
hsa-miR-5001-3p	SCAI
hsa-miR-5001-3p	STK32A
hsa-miR-5001-3p	TGFA
hsa-miR-5001-3p	VASH1
hsa-miR-148a-3p	CCT6A
hsa-miR-148a-3p	CDK5R1
hsa-miR-148a-3p	CEP55
hsa-miR-148a-3p	DNAJB4
hsa-miR-148a-3p	HDGF
hsa-miR-148a-3p	HOXC8
hsa-miR-148a-3p	KLF6
hsa-miR-148a-3p	LDLR
hsa-miR-148a-3p	NPTX1
hsa-miR-148a-3p	RASSF8
hsa-miR-148a-3p	RCC2
hsa-miR-148a-3p	S1PR1
hsa-miR-148a-3p	SECISBP2L
hsa-miR-148a-3p	STARD13
hsa-miR-148a-3p	TGFA
hsa-miR-148a-3p	TGFB2
hsa-miR-148a-3p	WNT1
hsa-miR-148a-3p	WNT10B
hsa-miR-1293	AOC3
hsa-miR-1293	CDK5R1
hsa-miR-1293	DAB2IP
hsa-miR-1293	LDLR
hsa-miR-1293	MEIS1
hsa-miR-1293	MKI67
hsa-miR-1293	NPTX1
hsa-miR-1293	NXPH3
hsa-miR-1293	PCP4L1
hsa-miR-1293	S1PR1
hsa-miR-1293	SCAI
hsa-miR-1293	SECISBP2L
hsa-miR-1293	SGMS2
hsa-miR-1293	SIRPA
hsa-miR-1293	TGFA
hsa-miR-1293	TMEM151B
hsa-miR-1293	TRIM59
hsa-miR-1293	VASH1
